# Supplementary material for: Antibacterial and Cytotoxic Phenolic Polyketides from Two Marine-Derived Fungal Strains of Aspergillus unguis
Source: MDPI journal article supplement (doi:10.3390/ph15010074), 2022-01-06
Supplement: s1 [file s1]

# Anti-Bacterial and Cytotoxic Phenolic Polyketides from Two Marine-Derived Fungal Strains of *Aspergillus unguis*

Cao Van Anh <sup>1,2</sup>, Joo-Hee Kwon <sup>3</sup>, Jong Soon Kang <sup>3</sup>, Hwa-Sun Lee <sup>1</sup>, Chang-Su Heo<sup>1,2</sup> and Hee Jae Shin <sup>1,2,\*</sup>

<sup>1</sup> Marine Natural Products Chemistry Laboratory, Korea Institute of Ocean Science and Technology, 385 Haeyang-ro, Yeongdo-gu, Busan 49111, Korea; caovananh@kiost.ac.kr (C.V.A.); hwasunlee@kiost.ac.kr (H.-S.L.); science30@kiost.ac.kr (C.-S.H.)

<sup>2</sup> Department of Marine Biotechnology, University of Science and Technology (UST), 217 Gajungro, Yuseong-gu, Daejeon 34113, Korea

<sup>3</sup> Laboratory Animal Resource Center, Korea Research Institute of Bioscience and Biotechnology, 30 Yeongudanjiro, Cheongju 28116, Korea; juhee@kribb.re.kr (J.-H.K.); kanjon@kribb.re.kr (J.S.K)

\* Correspondence: shinhj@kiost.ac.kr; Tel.: +82-51-664-3341; Fax: +82-51-664-3340

## Contents

|                                                                                                                                                |    |
|------------------------------------------------------------------------------------------------------------------------------------------------|----|
| <b>Figure S1.</b> Structures of <b>1-17</b> isolated from <i>A. unguis</i> IV17-109 and 158SC-067 (detailed). ....                             | 3  |
| <b>Figure S2.</b> Comparison of chemical shifts of the new compounds ( <b>1</b> , <b>3</b> , and <b>12</b> ) with those of their analogs. .... | 4  |
| <b>Figure S3.</b> HRESIMS data of <b>1</b> . ....                                                                                              | 5  |
| <b>Figure S4.</b> <sup>1</sup> H NMR spectrum of <b>1</b> . ....                                                                               | 6  |
| <b>Figure S5.</b> <sup>13</sup> C NMR spectrum of <b>1</b> . ....                                                                              | 6  |
| <b>Figure S6.</b> HSQC spectrum of <b>1</b> . ....                                                                                             | 7  |
| <b>Figure S7.</b> <sup>1</sup> H- <sup>1</sup> H COSY spectrum of <b>1</b> . ....                                                              | 8  |
| <b>Figure S8.</b> HMBC spectrum of <b>1</b> . ....                                                                                             | 9  |
| <b>Figure S9.</b> NOESY spectrum of <b>1</b> . ....                                                                                            | 10 |
| <b>Figure S10.</b> HRESIMS data of <b>3</b> . ....                                                                                             | 11 |
| <b>Figure S11.</b> <sup>1</sup> H NMR spectrum of <b>3</b> . ....                                                                              | 12 |
| <b>Figure S12.</b> <sup>13</sup> C NMR spectrum of <b>3</b> . ....                                                                             | 12 |
| <b>Figure S13.</b> HSQC spectrum of <b>3</b> . ....                                                                                            | 13 |
| <b>Figure S14.</b> <sup>1</sup> H- <sup>1</sup> H COSY spectrum of <b>3</b> . ....                                                             | 14 |
| <b>Figure S15.</b> HMBC spectrum of <b>3</b> . ....                                                                                            | 15 |
| <b>Figure S16.</b> NOESY spectrum of <b>3</b> . ....                                                                                           | 16 |
| <b>Figure S17.</b> HRESIMS data of <b>12</b> . ....                                                                                            | 17 |
| <b>Figure S18.</b> <sup>1</sup> H NMR spectrum of <b>12</b> . ....                                                                             | 18 |
| <b>Figure S19.</b> <sup>13</sup> C NMR spectrum of <b>12</b> . ....                                                                            | 18 |
| <b>Figure S20.</b> HSQC spectrum of <b>12</b> . ....                                                                                           | 19 |
| <b>Figure S21.</b> <sup>1</sup> H- <sup>1</sup> H COSY spectrum of <b>12</b> . ....                                                            | 20 |
| <b>Figure S23.</b> NOESY spectrum of <b>12</b> . ....                                                                                          | 22 |
| <b>Figure S24.</b> Comparison of optical rotation signs between <b>12</b> and other glycerides of carboxylic acids. .                          | 24 |
| <b>Figure S25.</b> <sup>1</sup> H NMR spectrum of decarboxyunguidepside A ( <b>2</b> ). ....                                                   | 25 |
| <b>Figure S26.</b> <sup>13</sup> C NMR spectrum of decarboxyunguidepside A ( <b>2</b> ). ....                                                  | 25 |
| <b>Figure S27.</b> <sup>1</sup> H NMR spectrum of <b>4</b> . ....                                                                              | 26 |
| <b>Figure S29.</b> <sup>1</sup> H NMR spectrum of <b>11</b> . ....                                                                             | 27 |
| <b>Figure S30.</b> <sup>13</sup> C NMR spectrum of <b>11</b> . ....                                                                            | 27 |
| <b>Figure S31.</b> Results of the cytotoxicity test of compounds <b>1-11</b> and <b>13-16</b> . ....                                           | 30 |

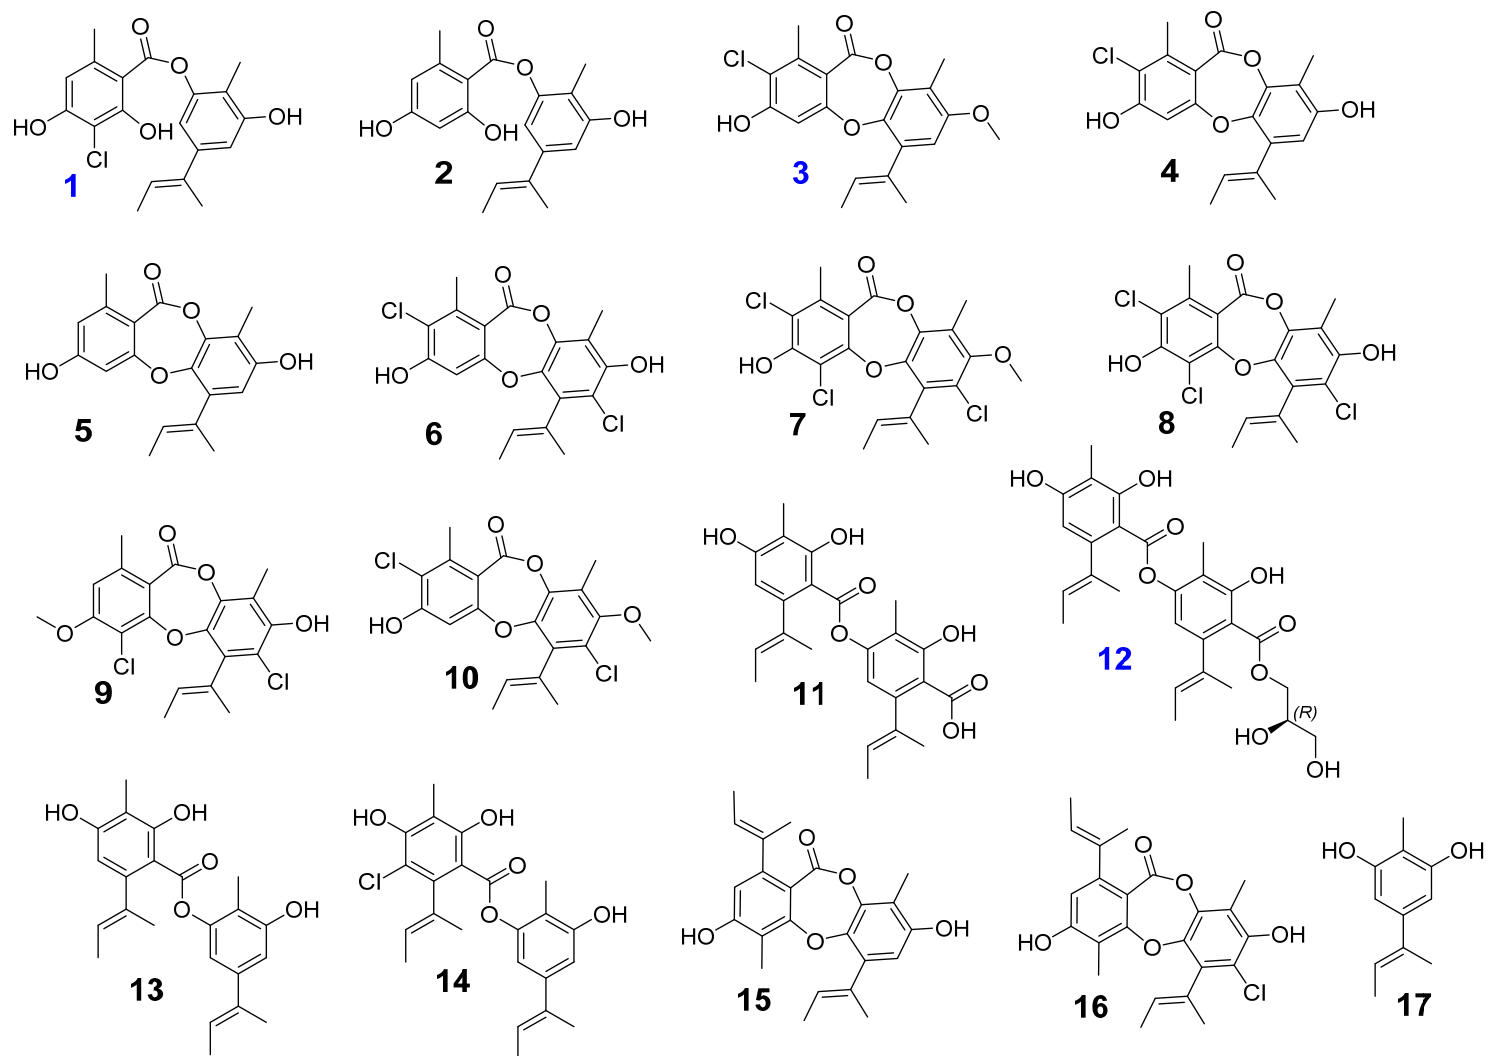

**Figure S1.** Structures of **1-17** isolated from *A. unguis* IV17-109 and 158SC-067 (detailed).



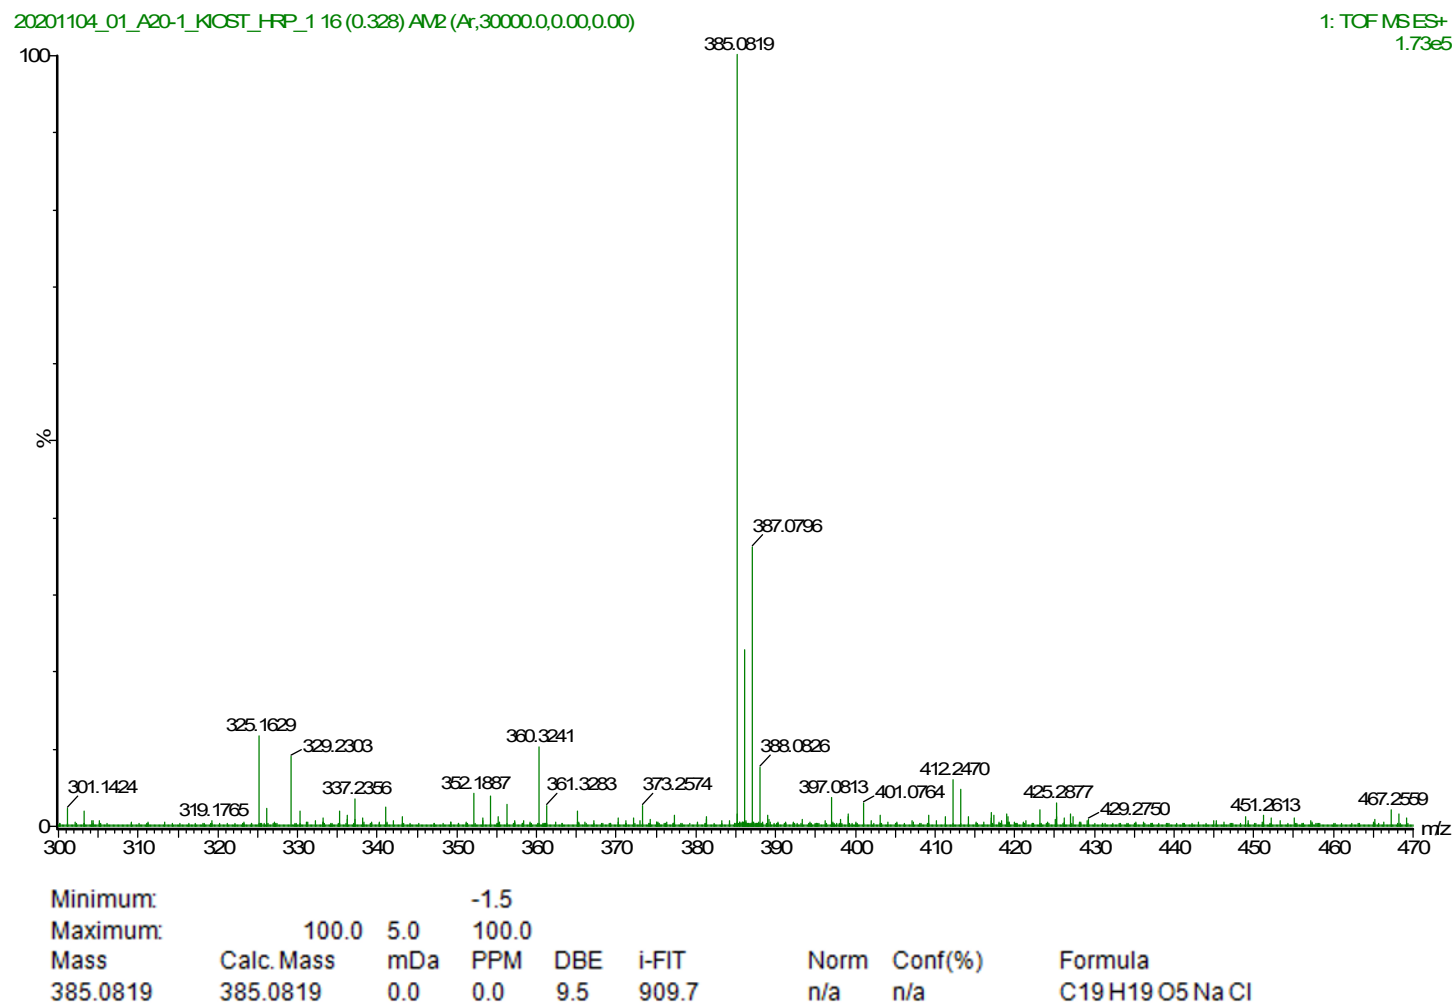

Figure S3. HRESIMS data of 1.

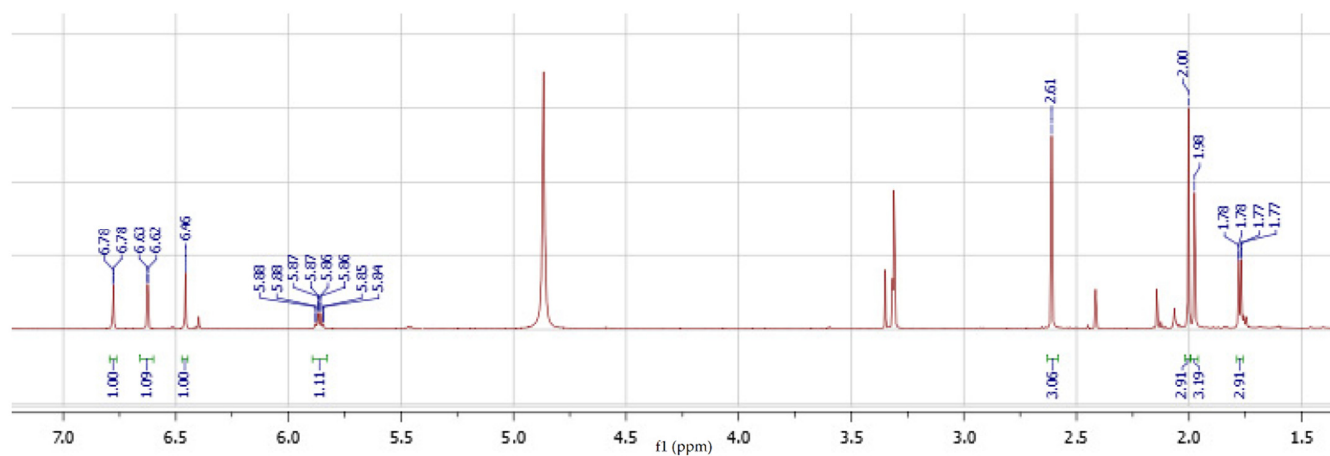

Figure S4. <sup>1</sup>H NMR spectrum of 1.

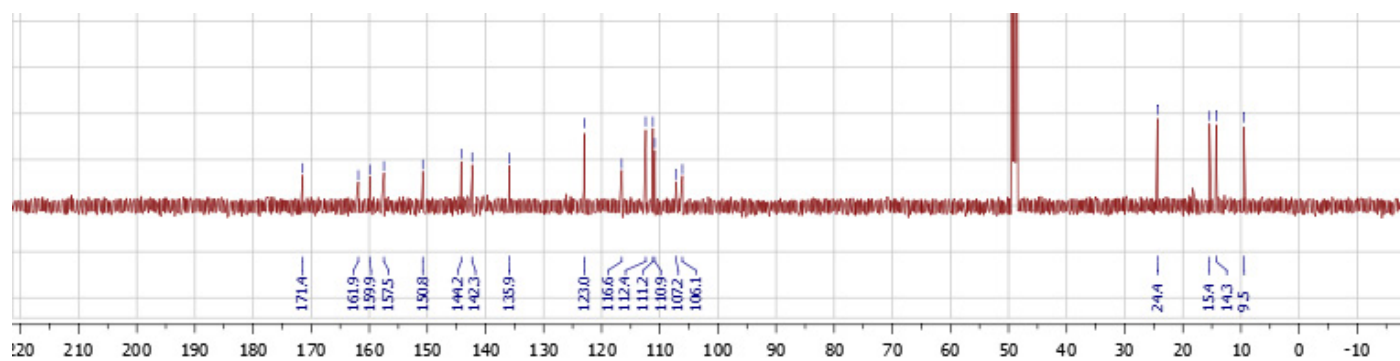

Figure S5. <sup>13</sup>C NMR spectrum of 1.

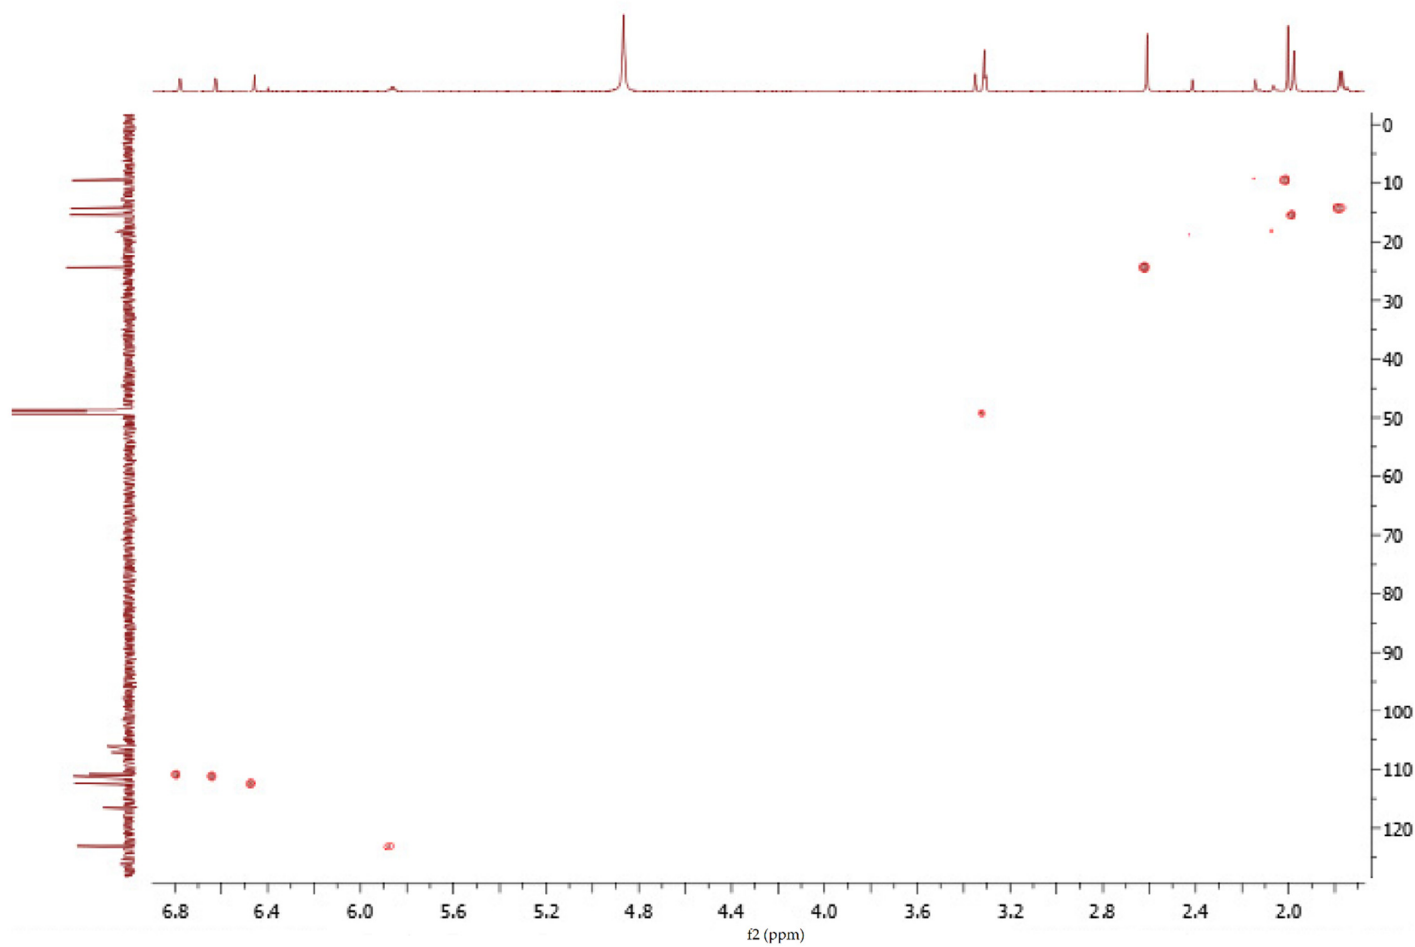

**Figure S6.** HSQC spectrum of **1**.

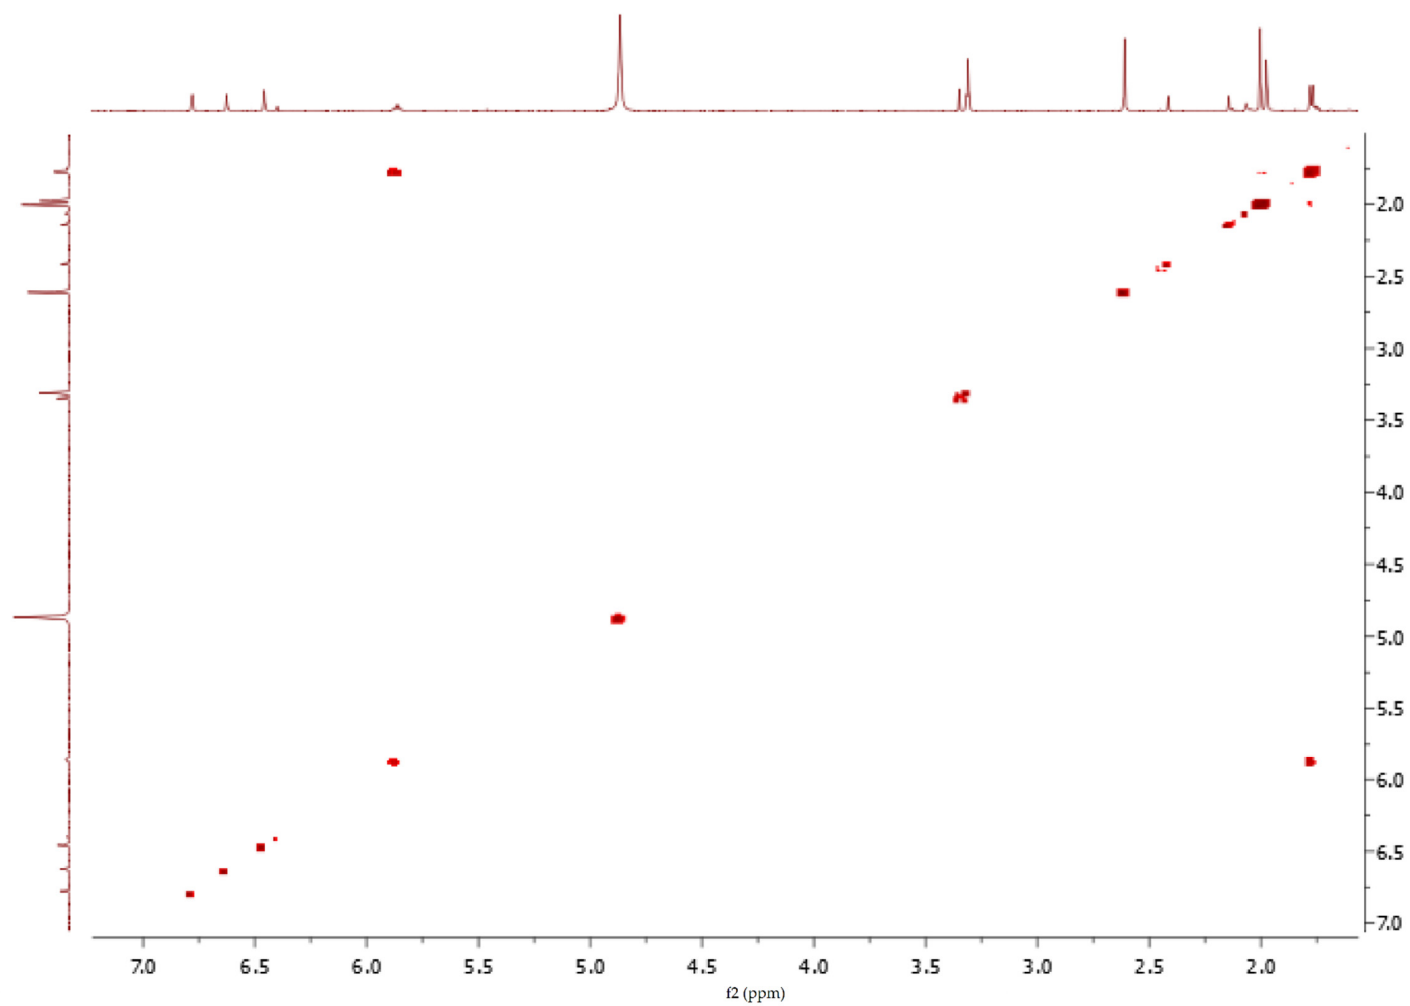

**Figure S7.**  $^1\text{H}$ - $^1\text{H}$  COSY spectrum of **1**.



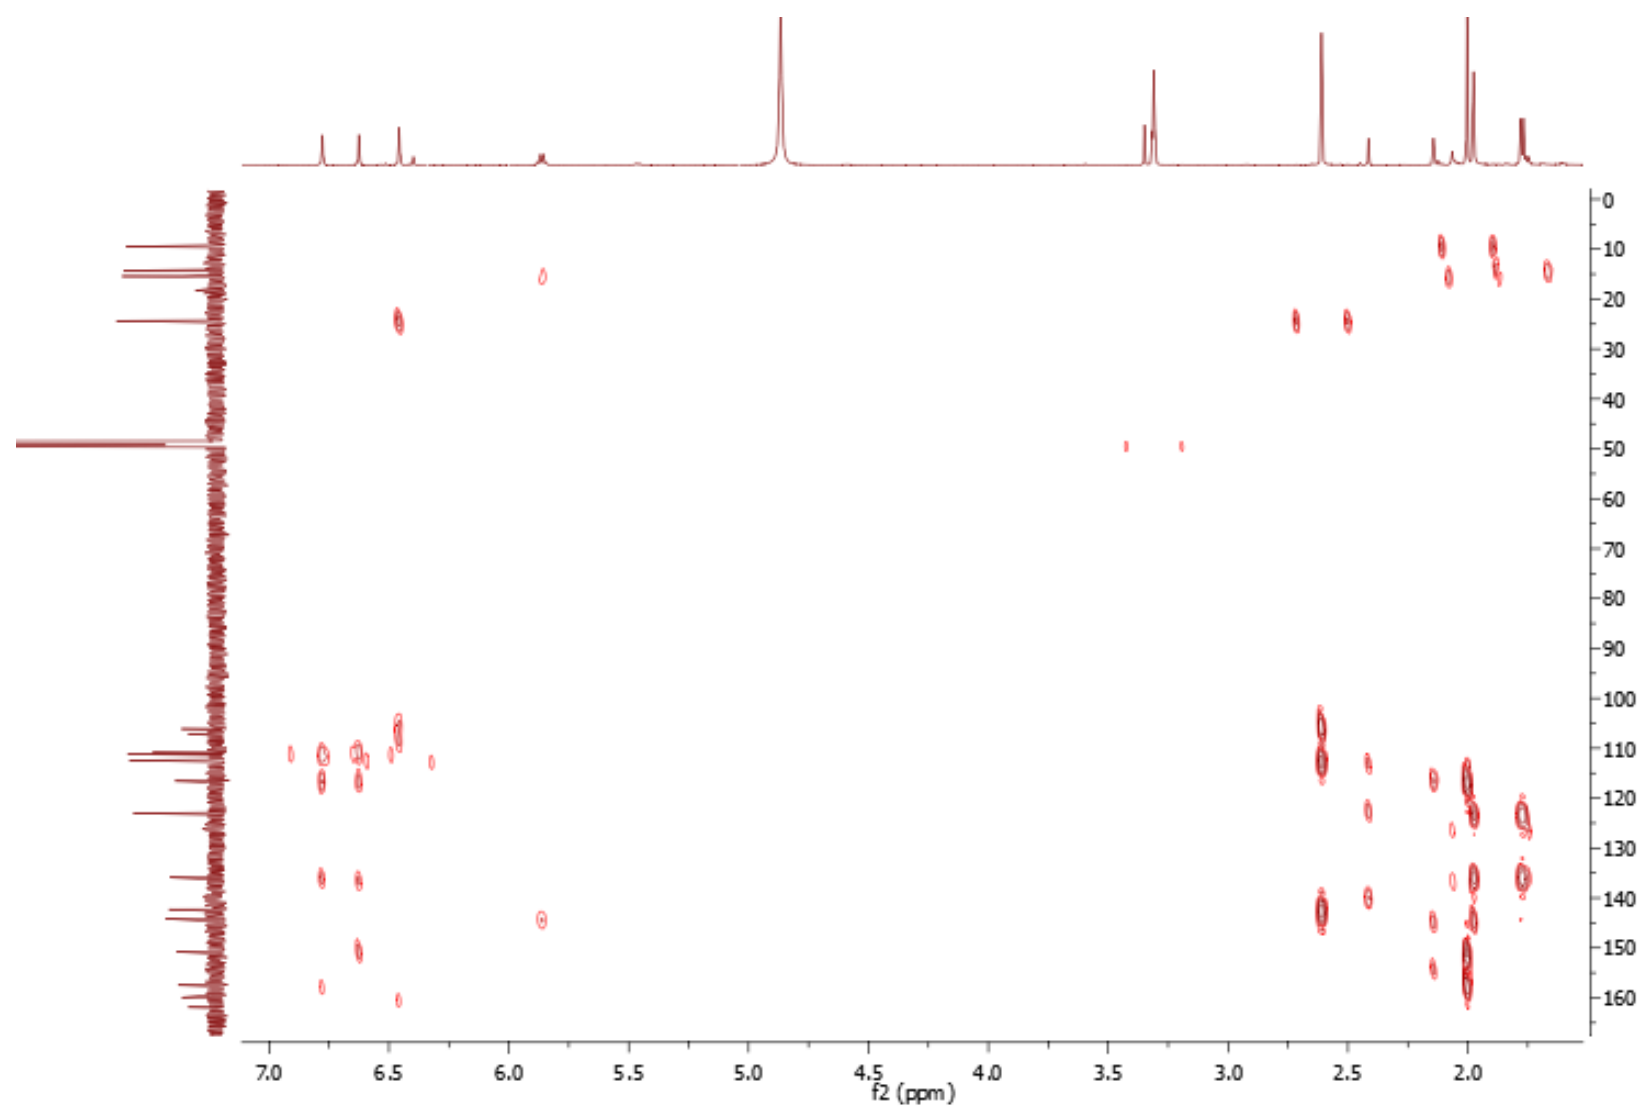

**Figure S8.** HMBC spectrum of **1**.

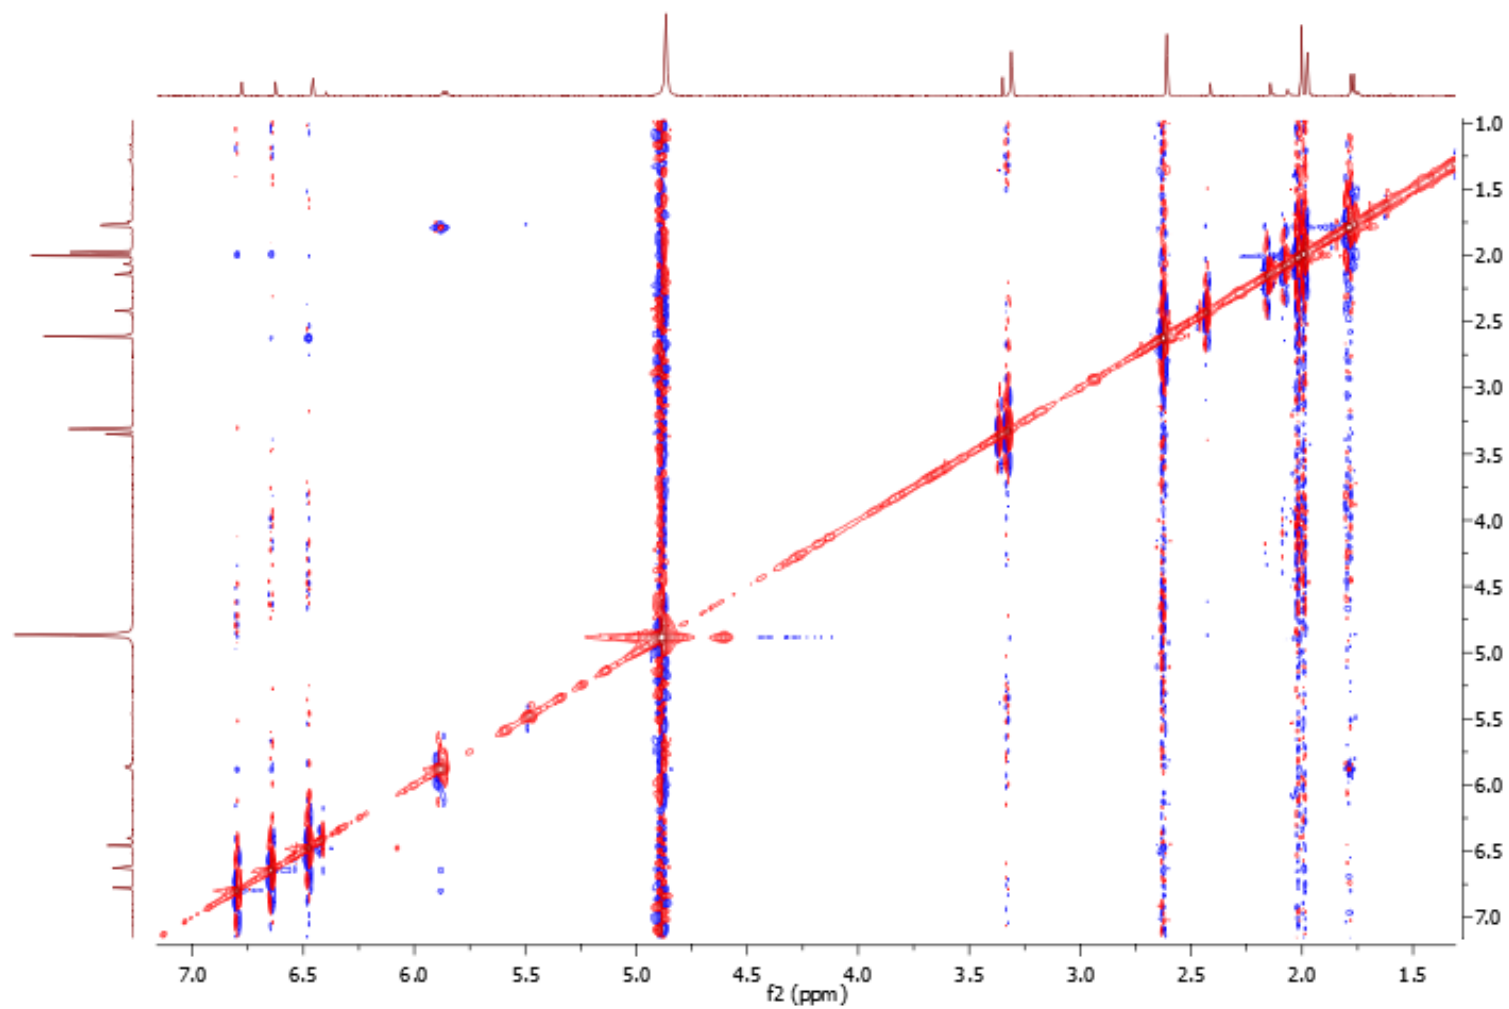

**Figure S9.** NOESY spectrum of **1**.

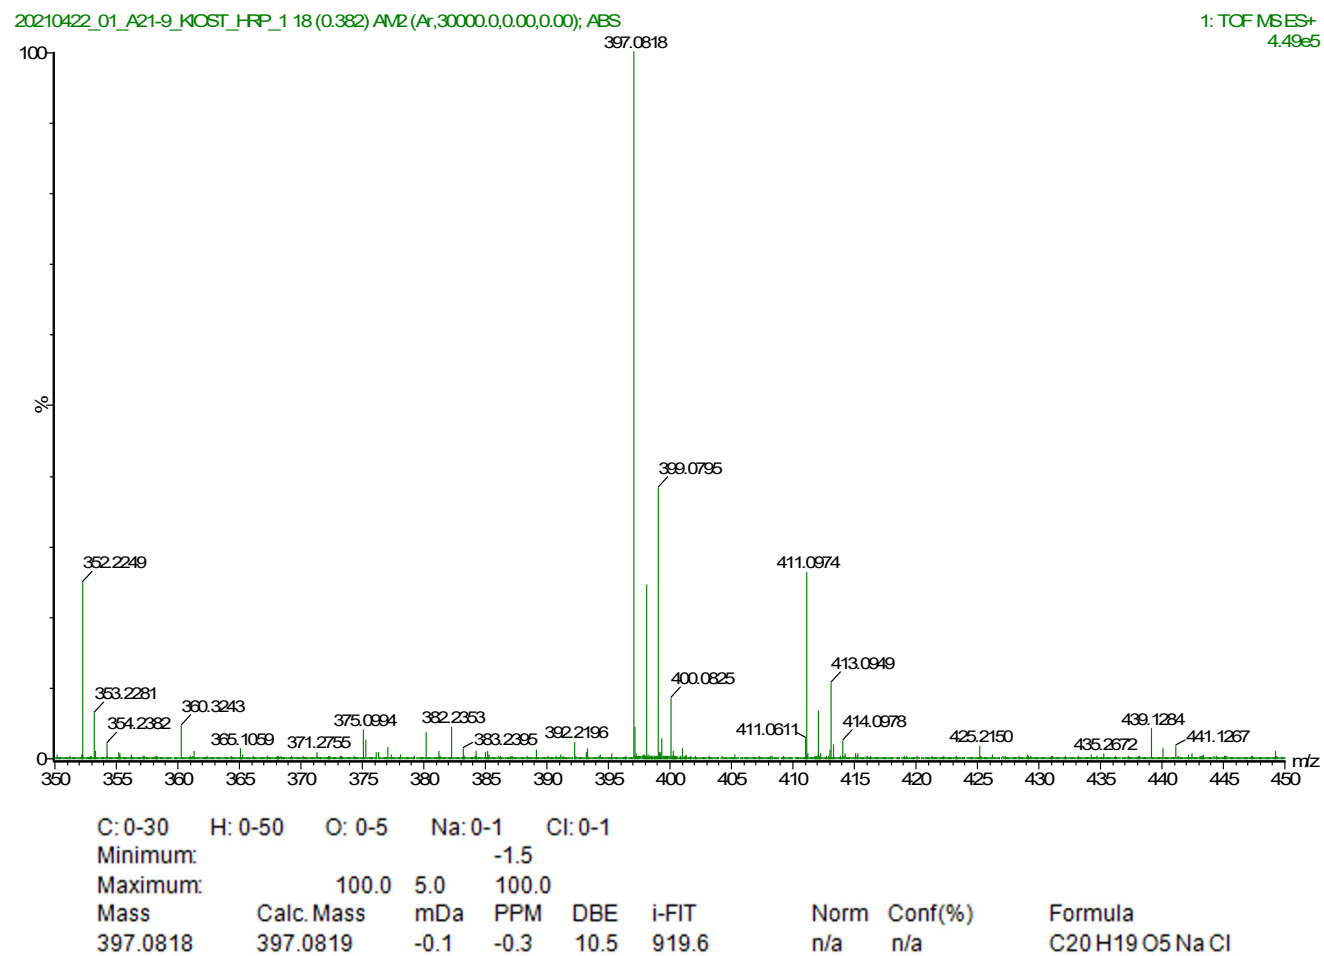

**Figure S10.** HRESIMS data of **3**.

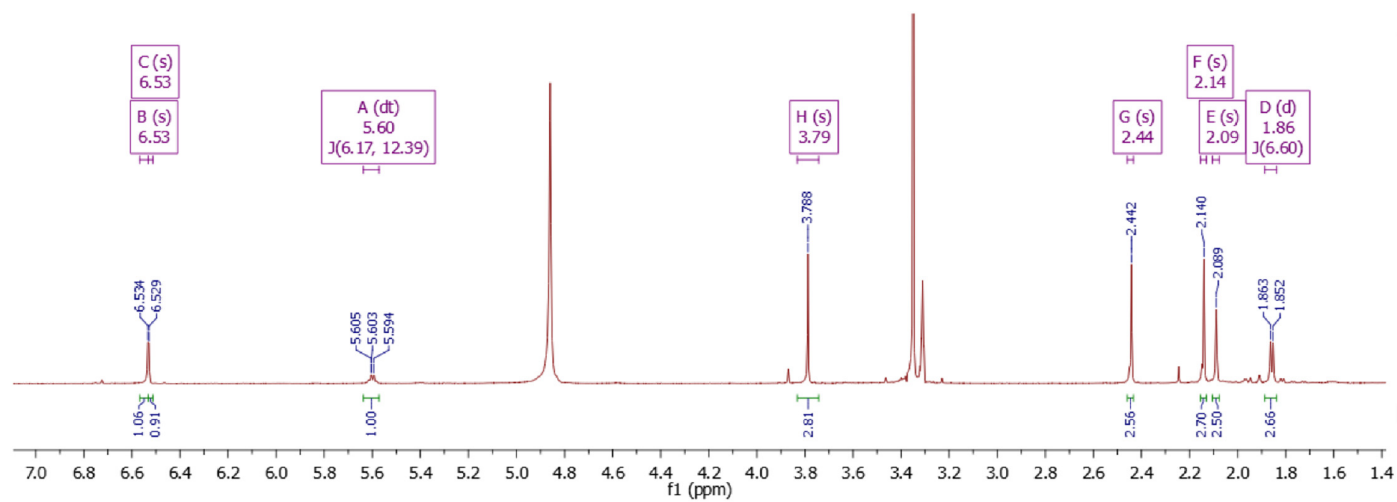

Figure S11. <sup>1</sup>H NMR spectrum of 3.

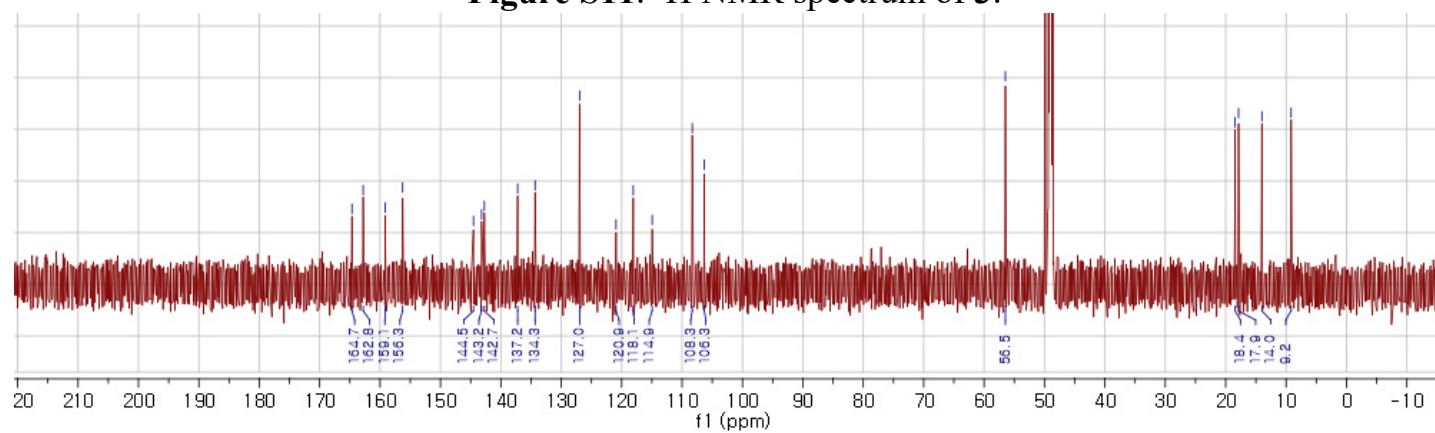

Figure S12. <sup>13</sup>C NMR spectrum of 3.

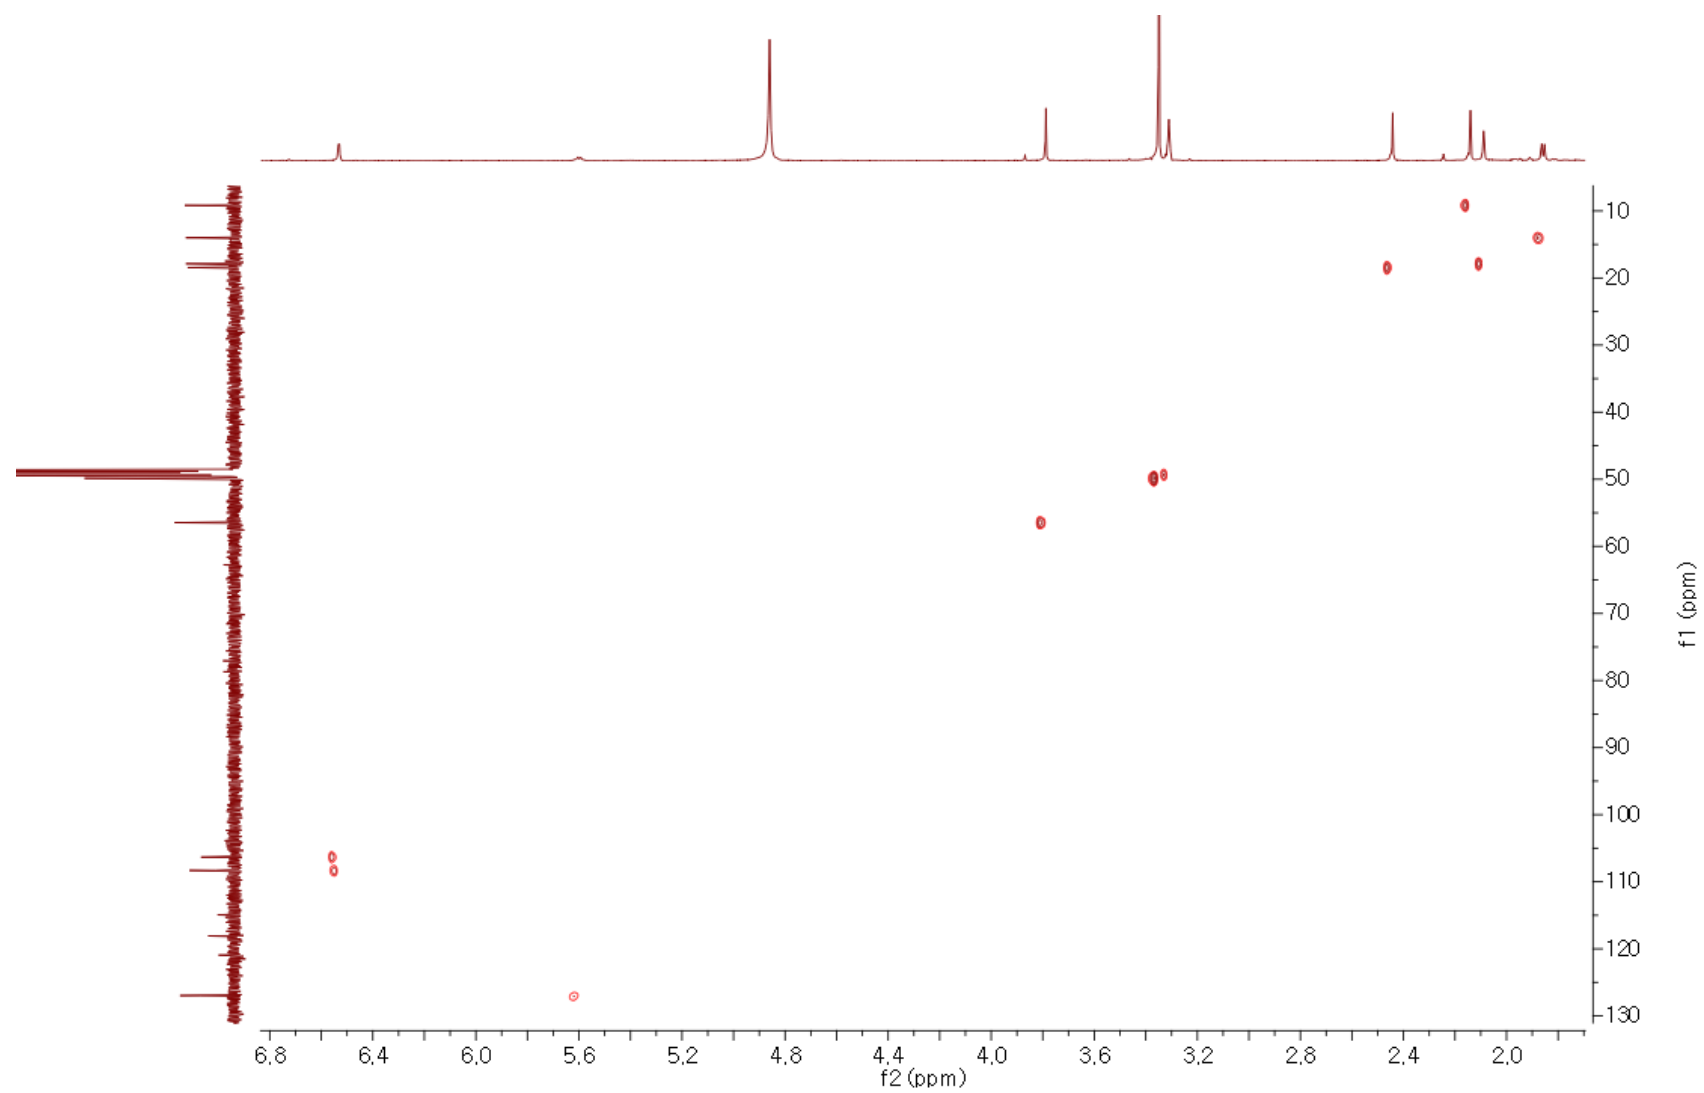

**Figure S13.** HSQC spectrum of **3**.

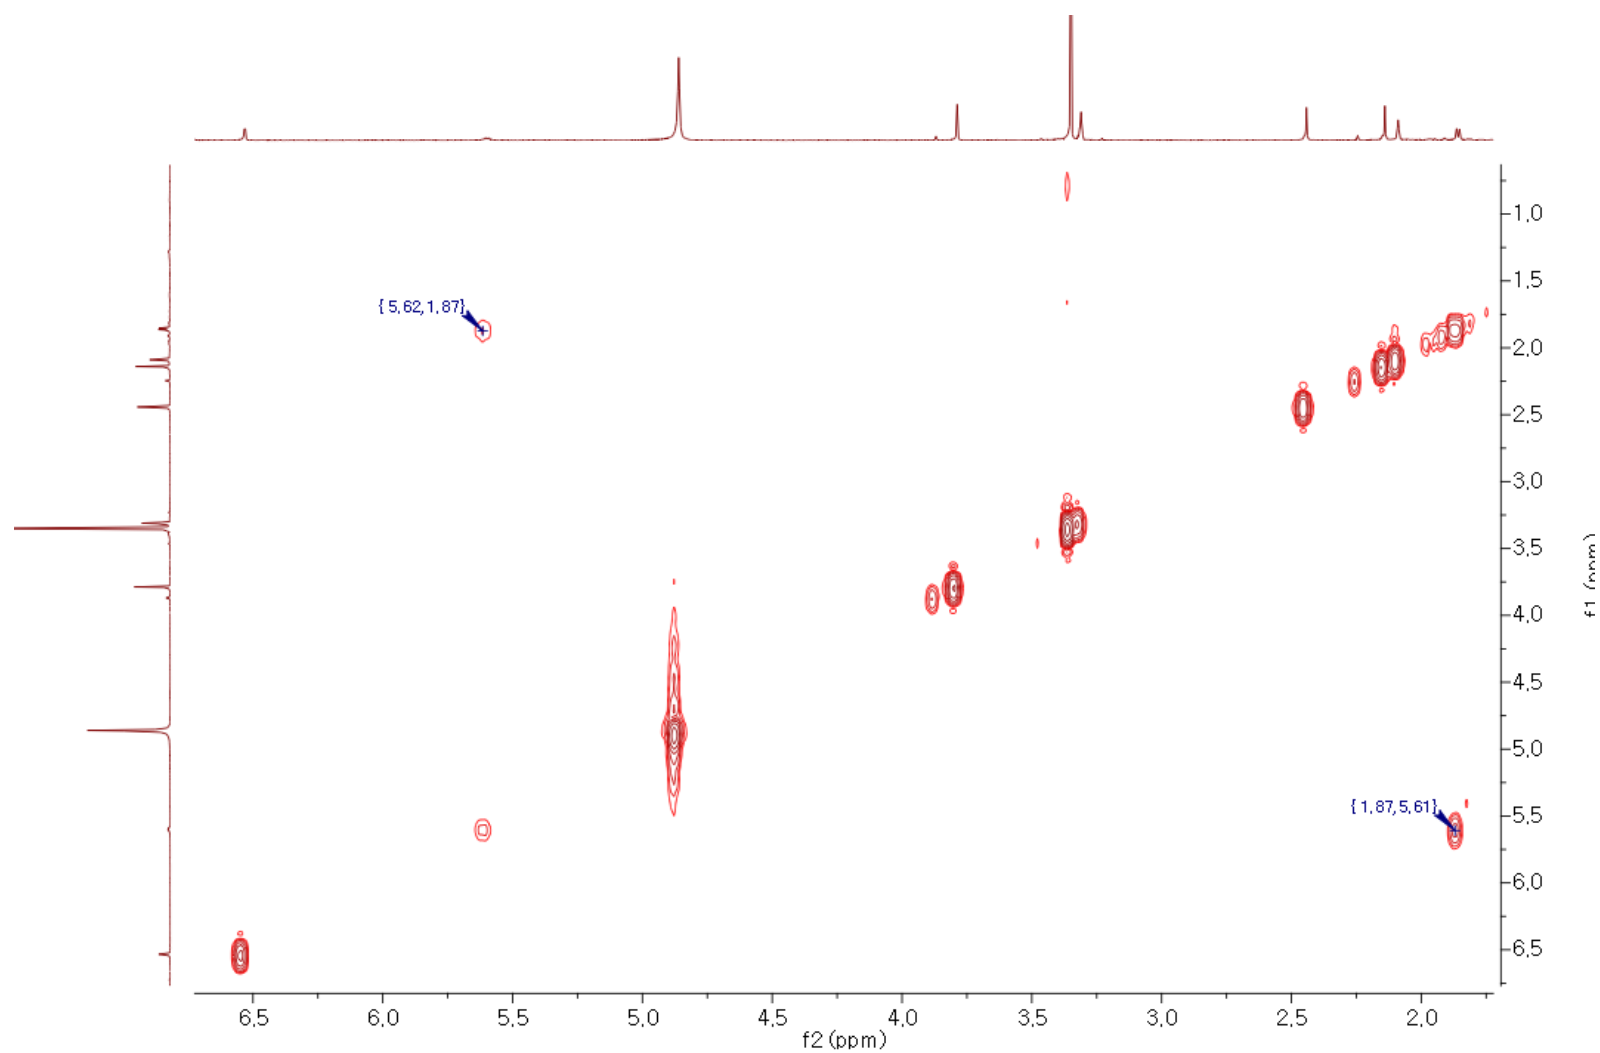

**Figure S14.**  $^1\text{H}$ - $^1\text{H}$  COSY spectrum of **3**.

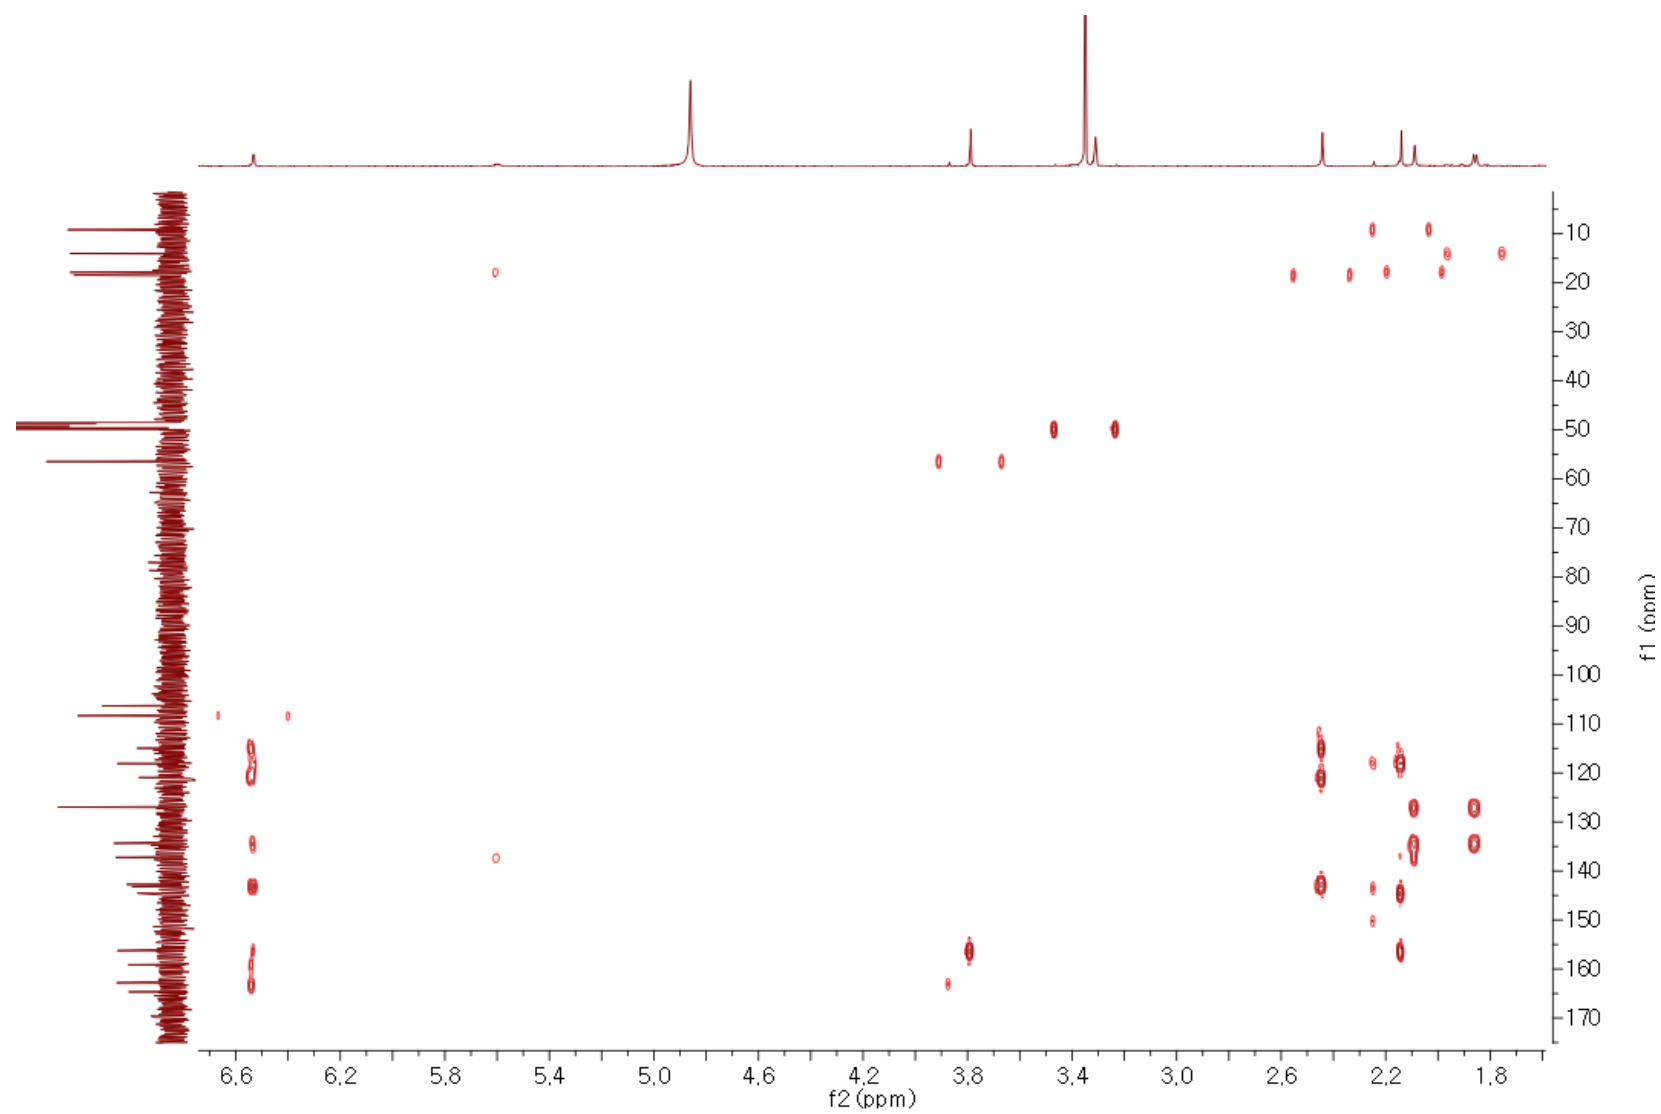

**Figure S15.** HMBC spectrum of **3**.

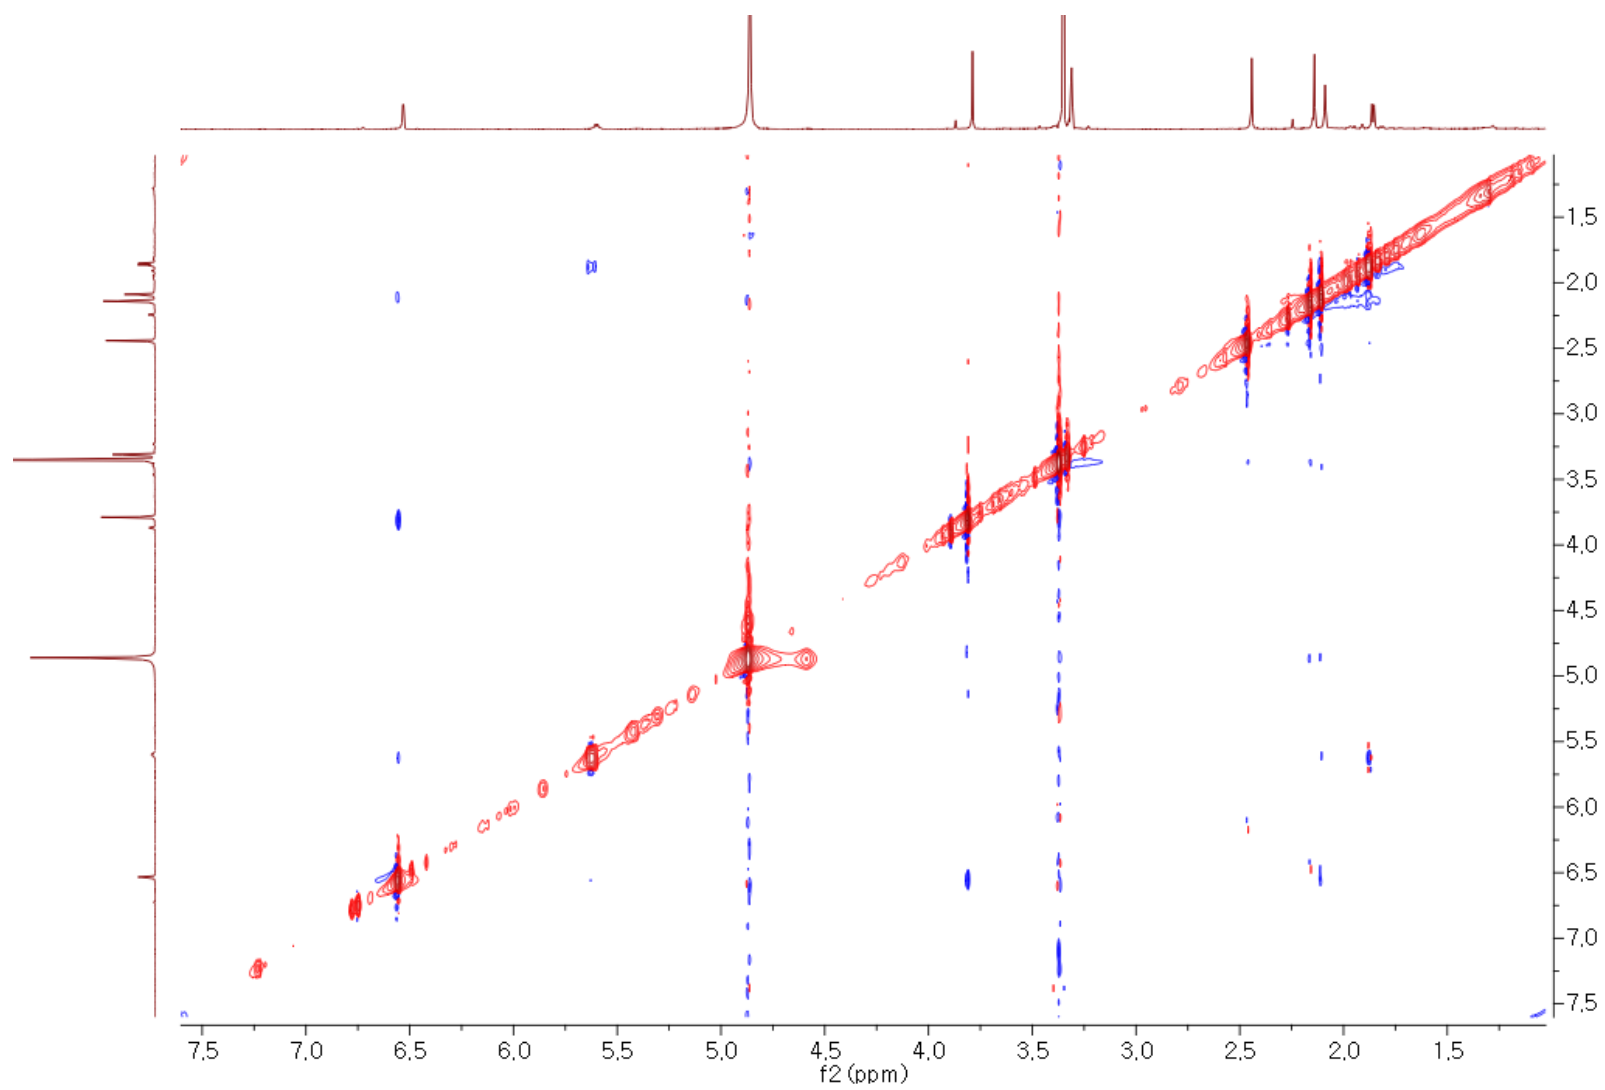

**Figure S16.** NOESY spectrum of **3**.



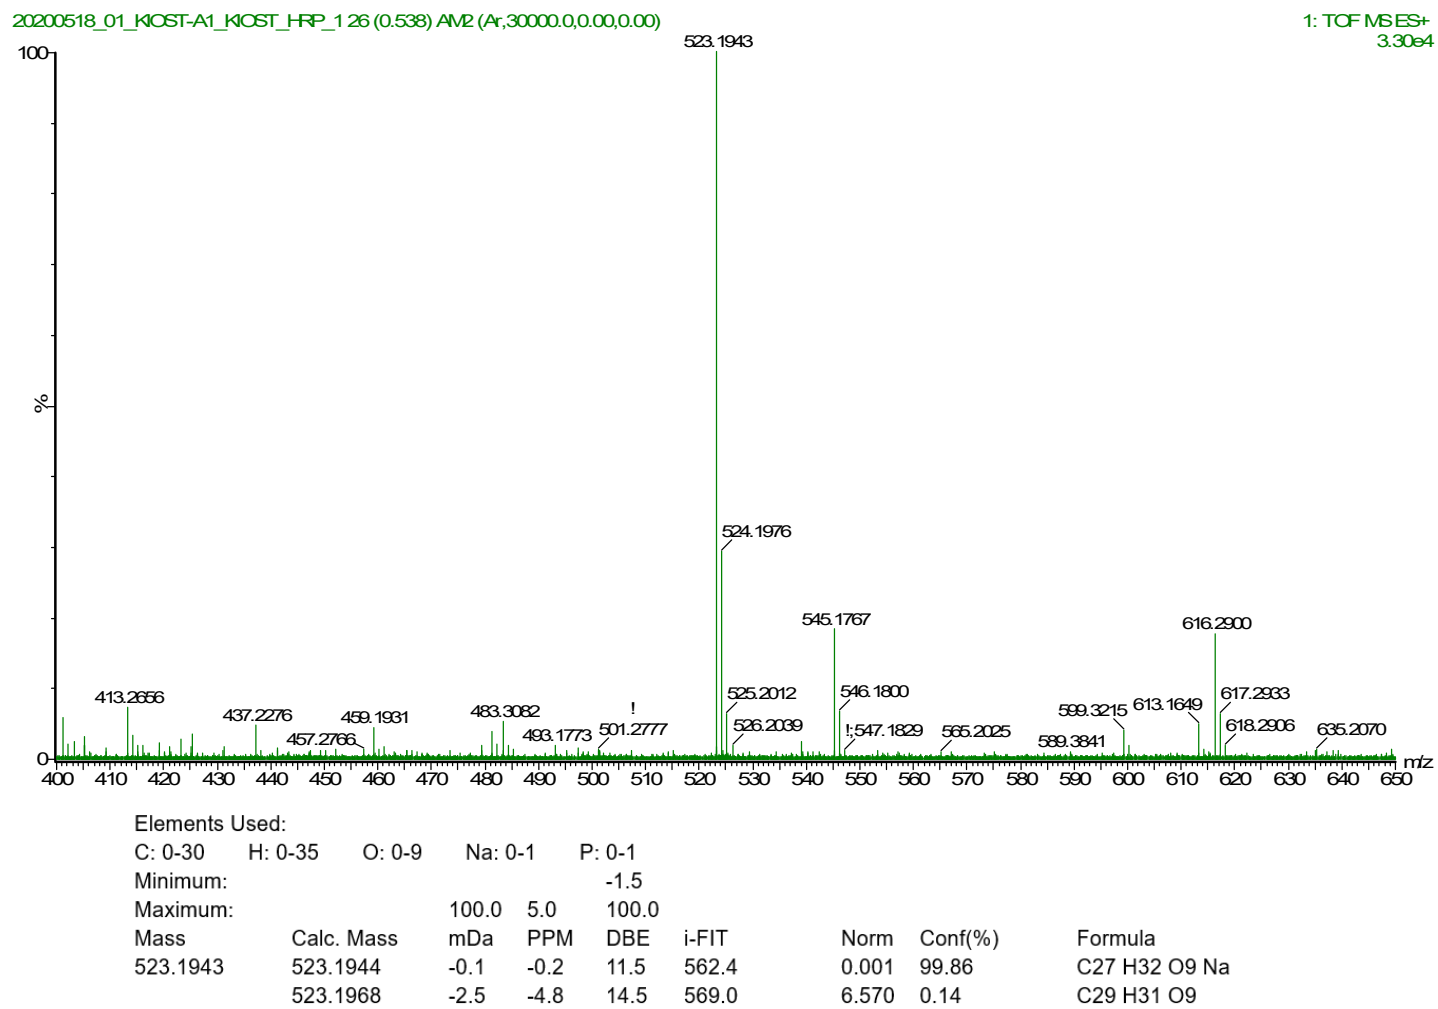

**Figure S17.** HRMSMS data of **12**.

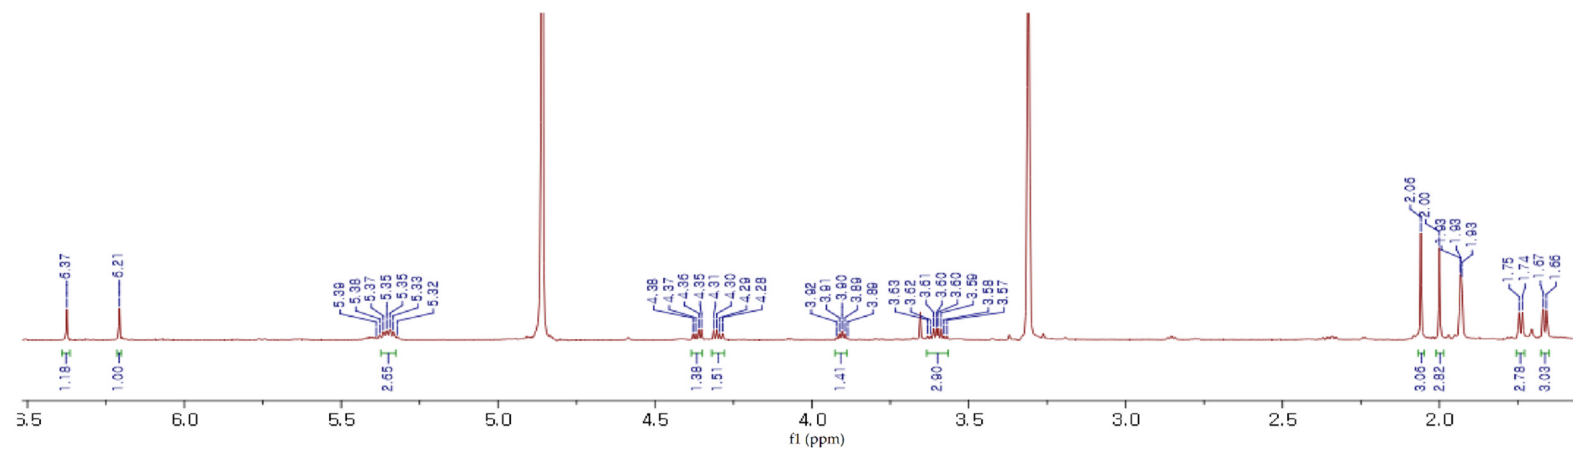

Figure S18. <sup>1</sup>H NMR spectrum of 12.

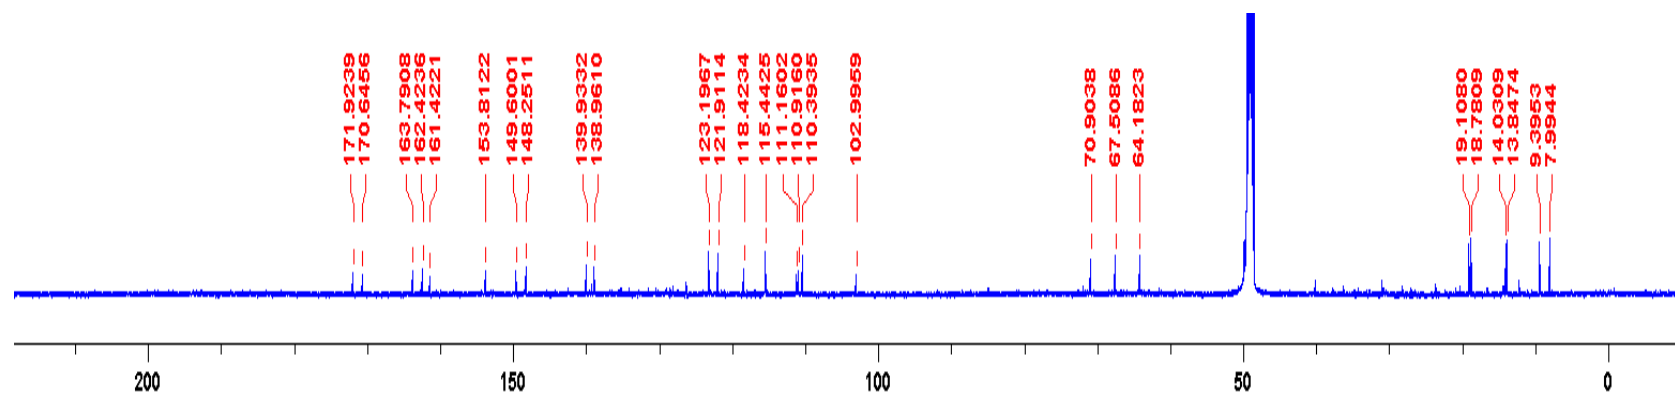

Figure S19. <sup>13</sup>C NMR spectrum of 12.

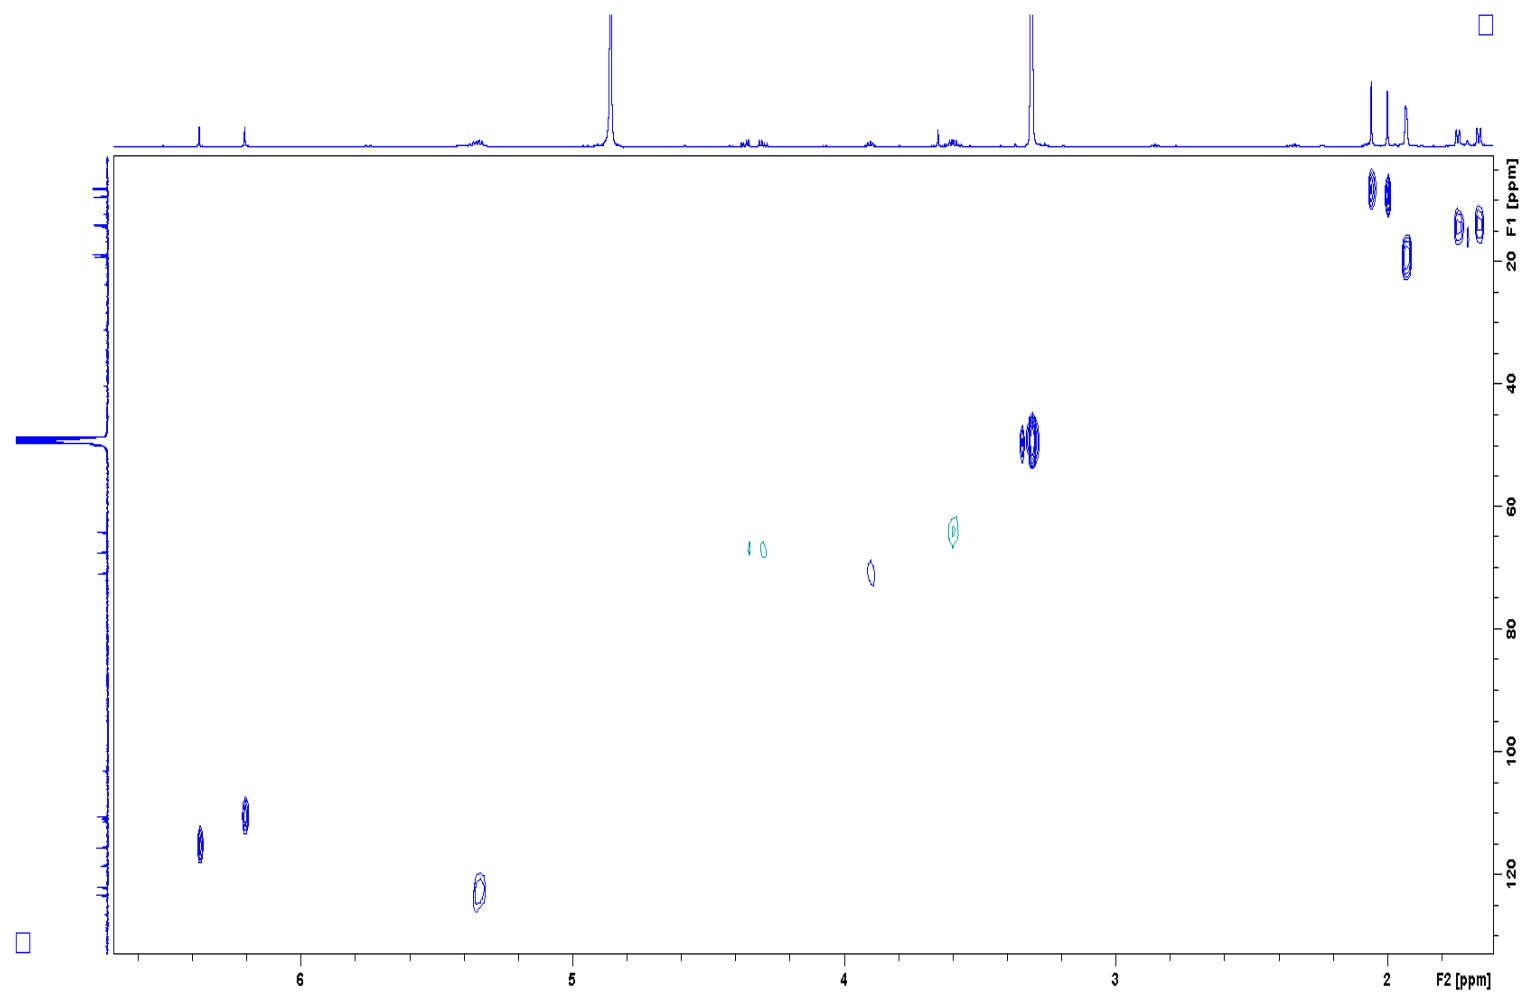

**Figure S20.** HSQC spectrum of **12**.

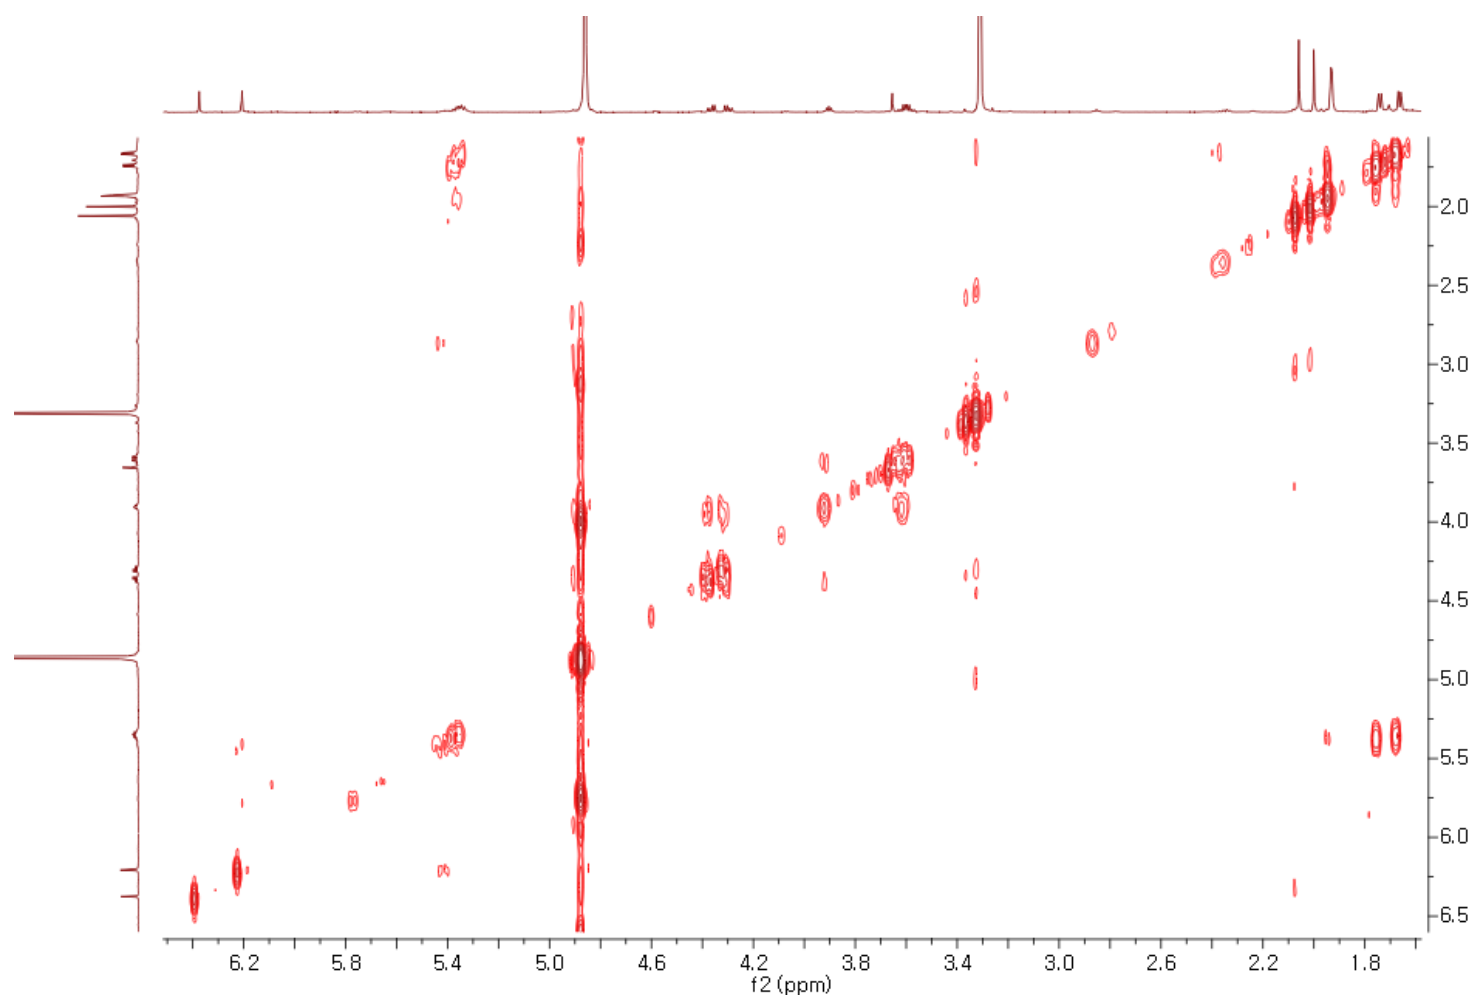

**Figure S21.**  $^1\text{H}$ - $^1\text{H}$  COSY spectrum of **12**.

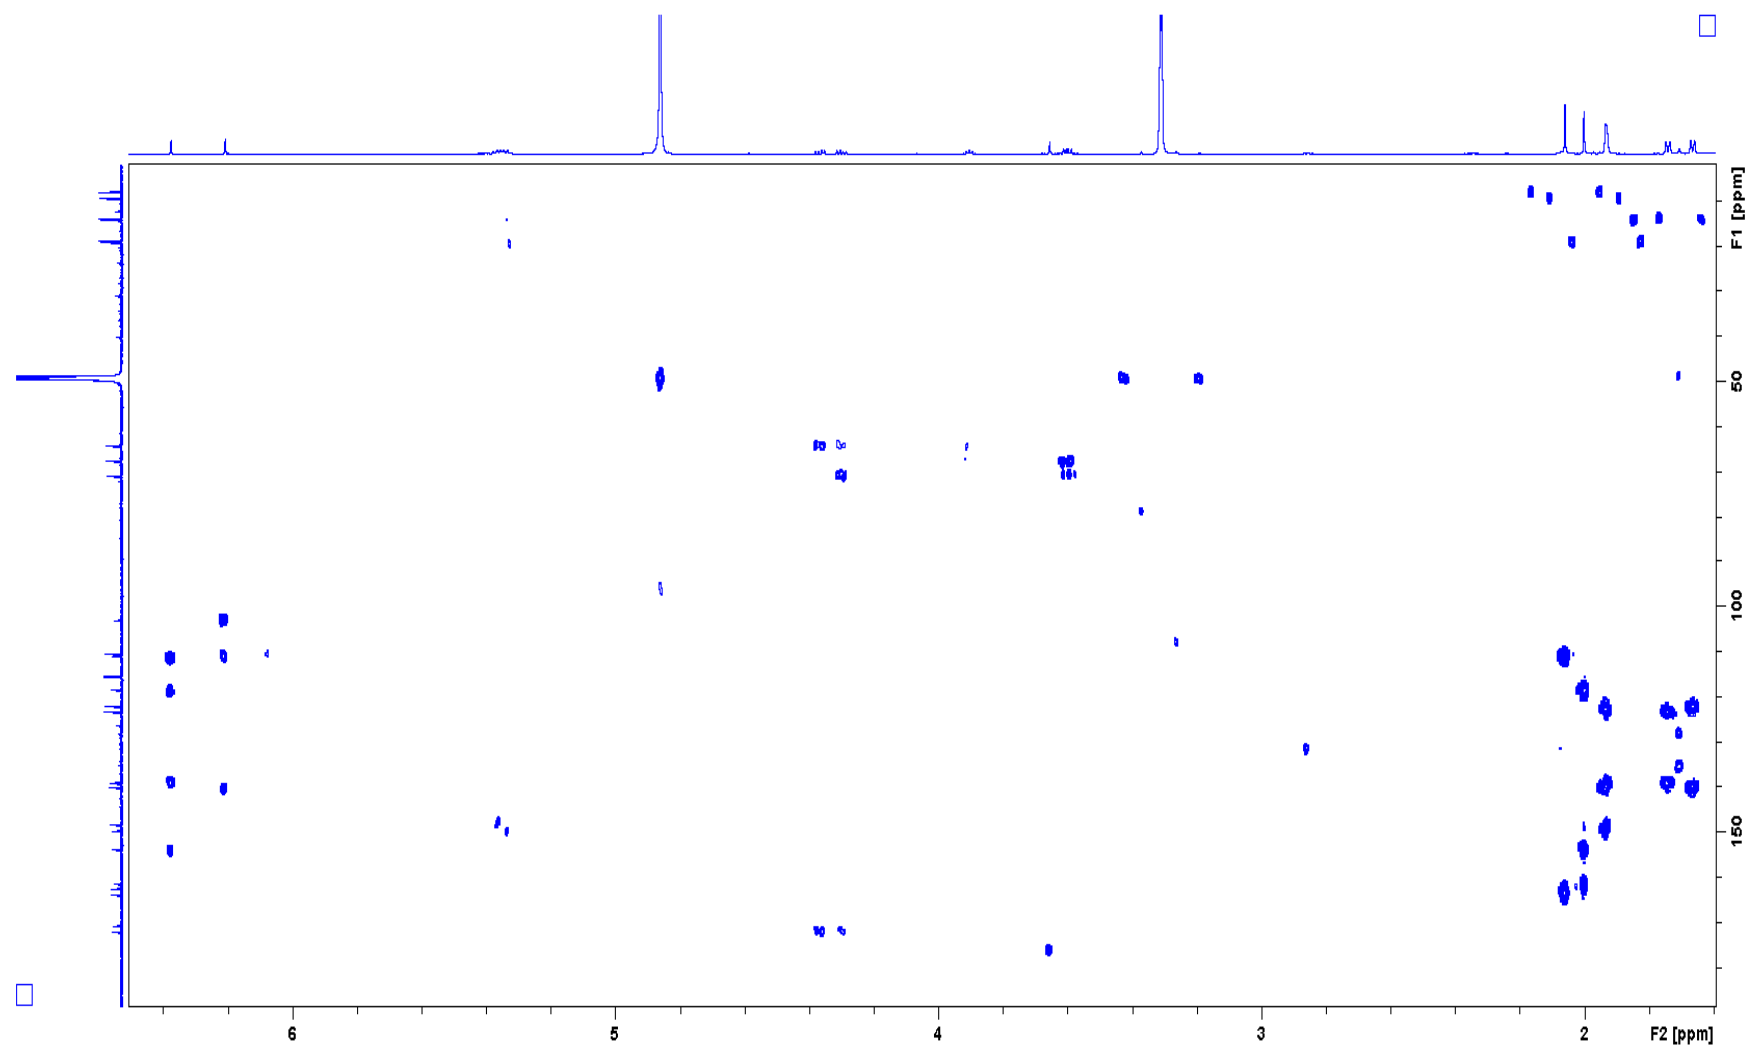

**Figure S22.** HMBC spectrum of **12**.

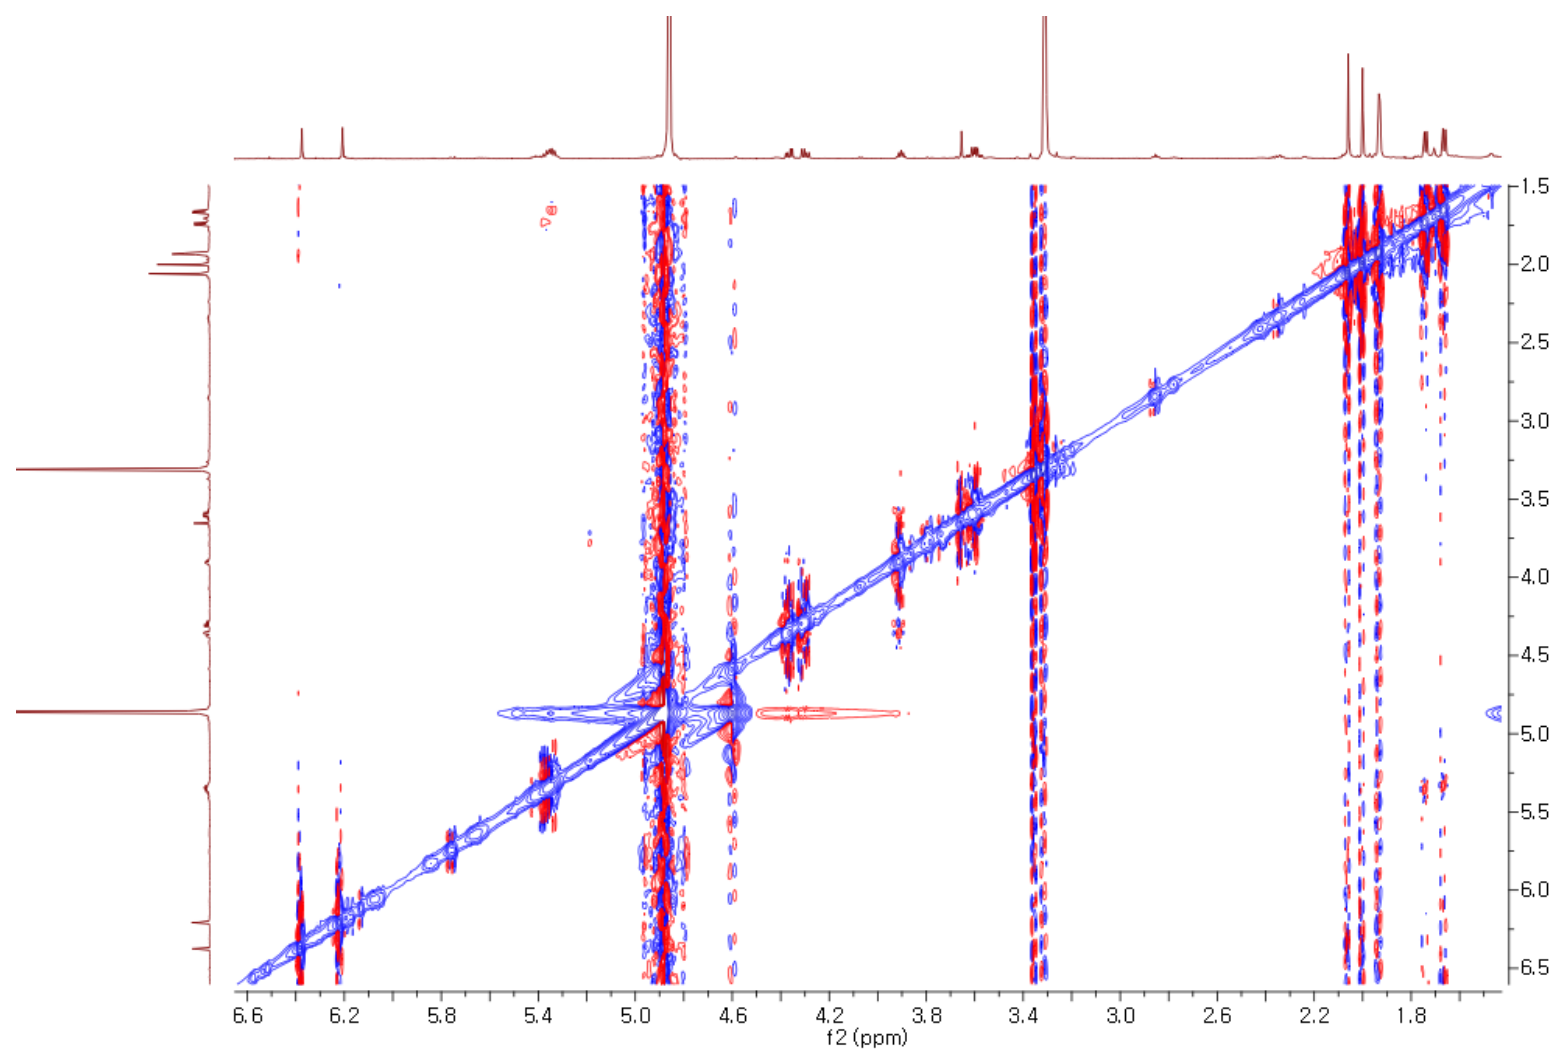

**Figure S23.** NOESY spectrum of **12**.

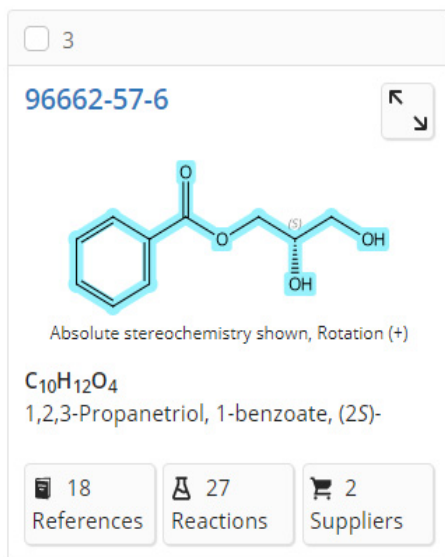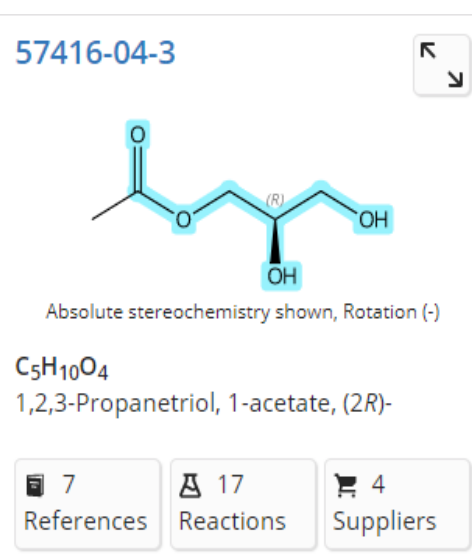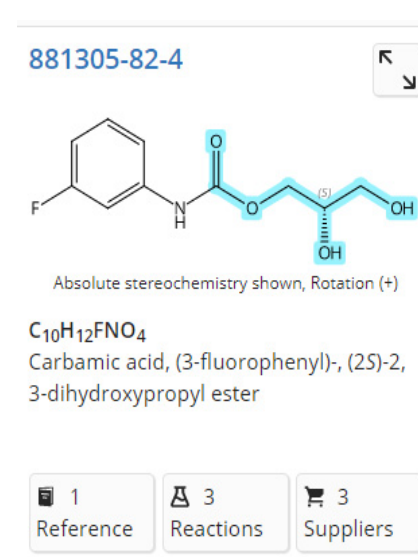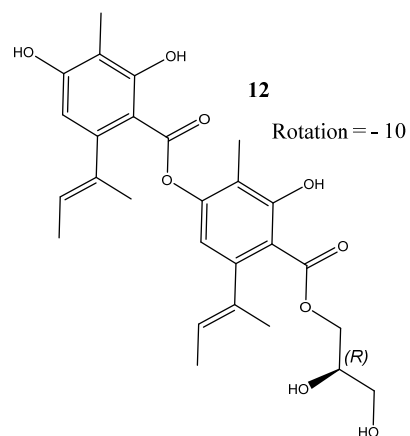

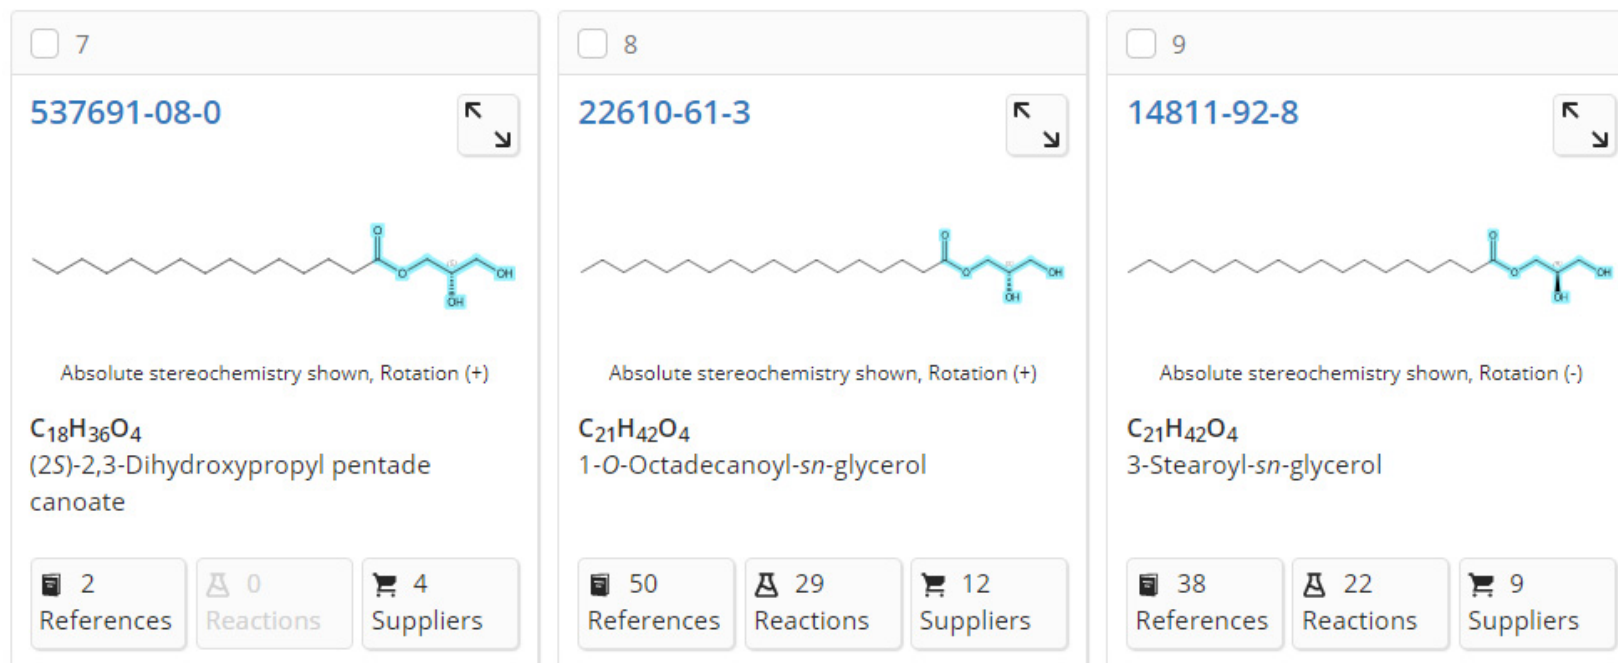

**Figure S24.** Comparison of optical rotation signs between **12** and other glycerides of carboxylic acids.



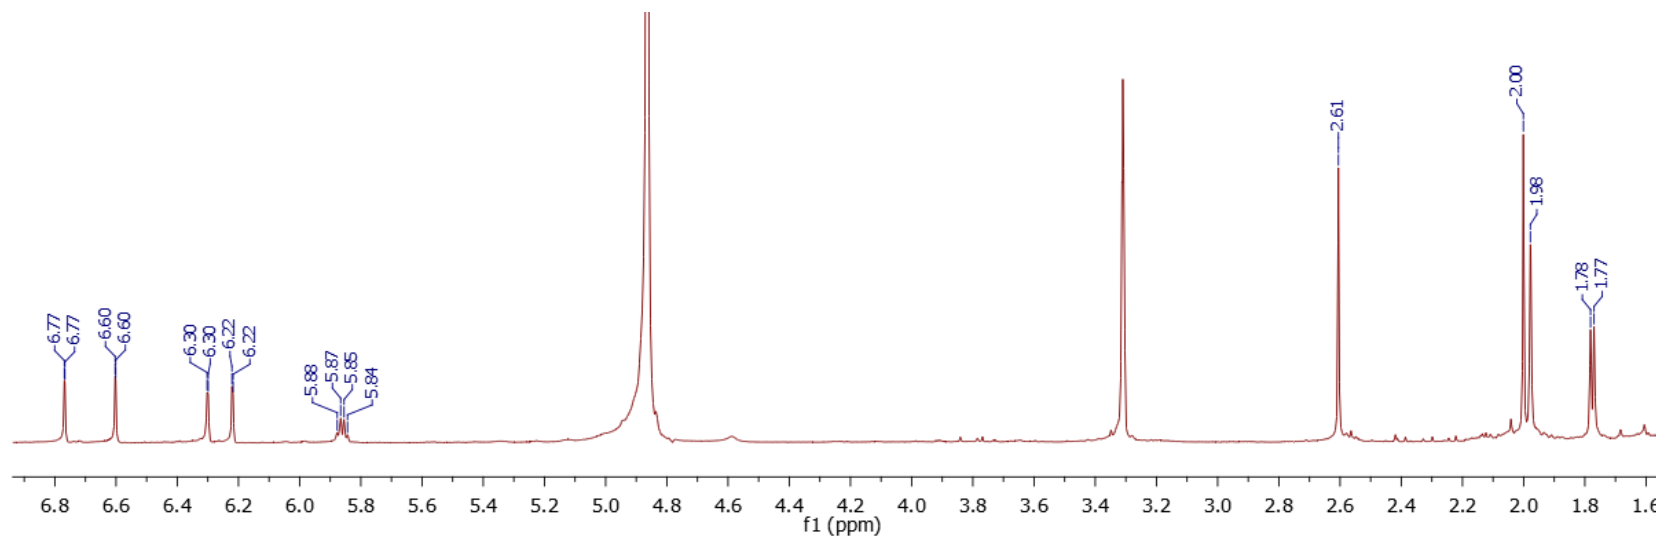

**Figure S25.** <sup>1</sup>H NMR spectrum of decarboxyunguidepside A (2).

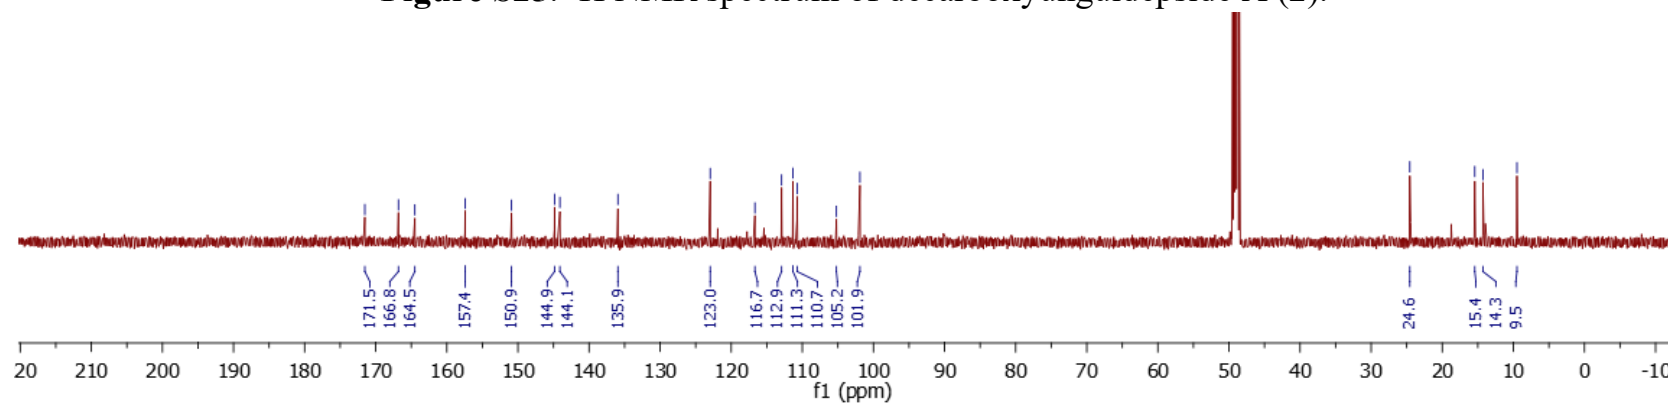

**Figure S26.** <sup>13</sup>C NMR spectrum of decarboxyunguidepside A (2).

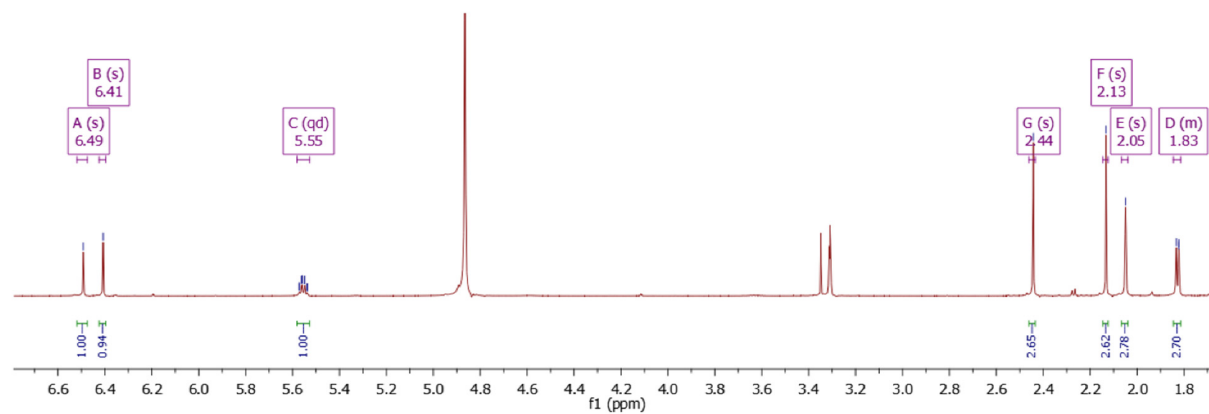

Figure S27. <sup>1</sup>H NMR spectrum of **4**.

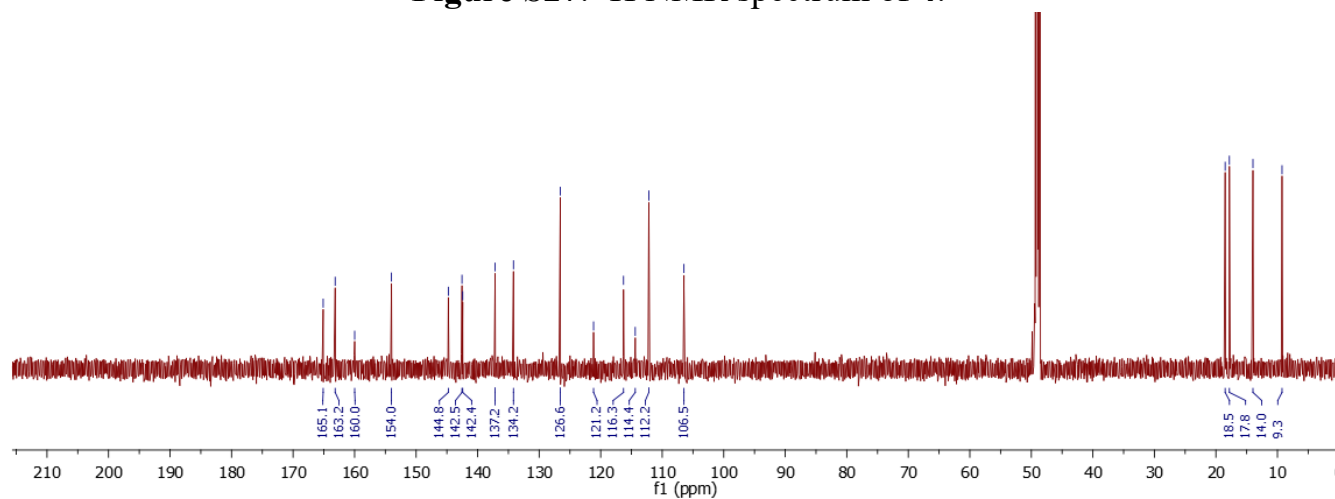

Figure S28. <sup>13</sup>C NMR spectrum of **4**.

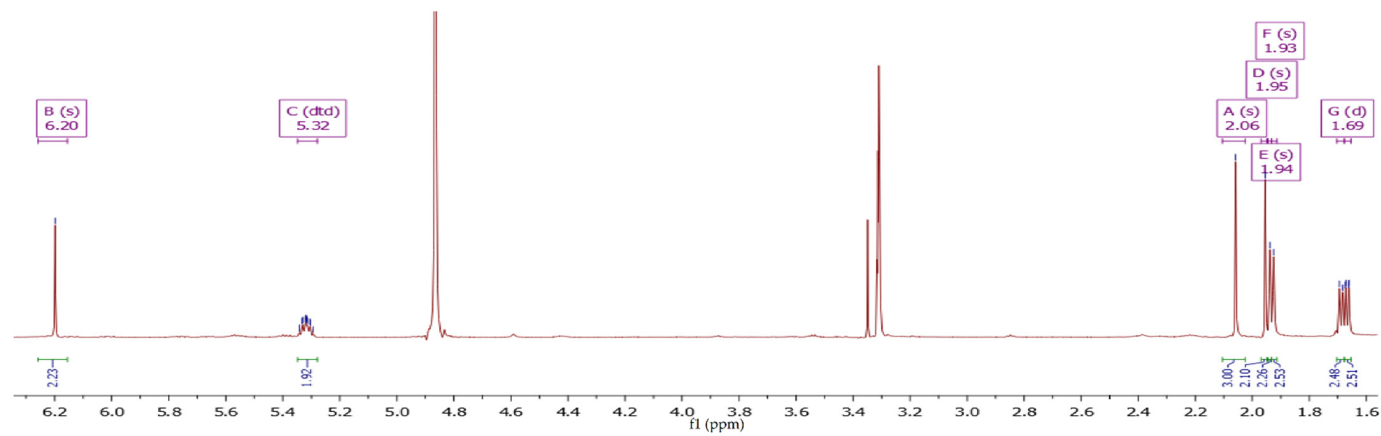

**Figure S29.** <sup>1</sup>H NMR spectrum of **11**.

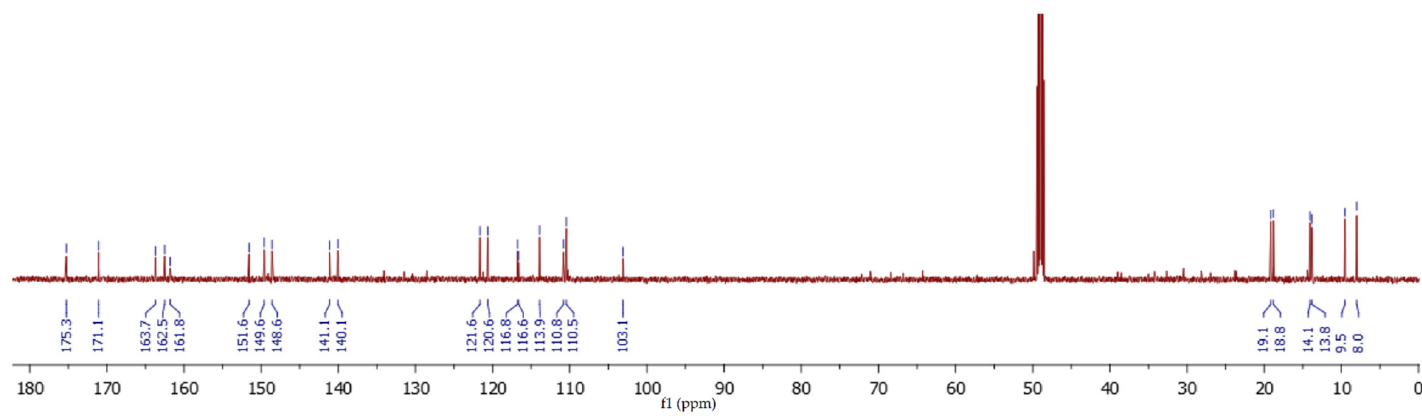

**Figure S30.** <sup>13</sup>C NMR spectrum of **11**.

| ACHN         |        |      |        |      |        |      |        |      |        |      |        |      |        |      |            |      |
|--------------|--------|------|--------|------|--------|------|--------|------|--------|------|--------|------|--------|------|------------|------|
| Compound     | 1      |      | 2      |      | 3      |      | 4      |      | 5      |      | 6      |      | 7      |      | 8          |      |
| Conc.(ug/ml) | Mean   | SD   | Mean       | SD   |
| 30           | -11.74 | 6.98 | -27.25 | 6.19 | -20.33 | 2.54 | -28.45 | 4.20 | -25.45 | 7.14 | -20.04 | 9.88 | 0.22   | 2.87 | -22.62     | 5.41 |
| 10           | 21.50  | 8.31 | -15.83 | 8.58 | 19.32  | 4.76 | -5.75  | 3.46 | -12.08 | 2.34 | -8.63  | 6.06 | 70.92  | 7.86 | 23.46      | 3.72 |
| 3            | 75.37  | 3.45 | 23.72  | 5.09 | 75.00  | 9.16 | 13.33  | 6.59 | 27.91  | 3.44 | 22.02  | 7.15 | 84.61  | 3.44 | 60.17      | 6.11 |
| 1            | 91.86  | 5.91 | 37.88  | 9.23 | 92.13  | 4.04 | 82.94  | 4.58 | 70.20  | 6.80 | 86.25  | 5.31 | 91.20  | 4.08 | 72.23      | 2.06 |
| 0.3          | 99.47  | 1.89 | 85.18  | 5.50 | 100.24 | 4.56 | 91.39  | 5.73 | 94.53  | 5.81 | 95.58  | 6.07 | 100.61 | 4.78 | 90.34      | 1.19 |
| GI50 (ug/ml) | 5.043  |      | 0.820  |      | 4.842  |      | 1.640  |      | 1.620  |      | 1.907  |      | 12.27  |      | 3.150      |      |
| GI50 (uM)    | 13.9   |      | 2.5    |      | 12.9   |      | 4.6    |      | 5.0    |      | 4.8    |      | 27.7   |      | 7.3        |      |
|              |        |      |        |      |        |      |        |      |        |      |        |      |        |      |            |      |
| Compound     | 9      |      | 10     |      | 11     |      | 13     |      | 14     |      | 15     |      | 16     |      | Adriamycin |      |
| Conc.(ug/ml) | Mean   | SD   | Mean       | SD   |
| 30           | 84.87  | 4.21 | 15.20  | 6.82 | 33.00  | 7.62 | -18.46 | 5.90 | -10.47 | 2.58 | -4.03  | 8.68 | -6.93  | 4.80 | -14.99     | 2.94 |
| 10           | 87.52  | 4.85 | 76.50  | 5.46 | 73.04  | 3.28 | -10.47 | 6.90 | 24.35  | 9.81 | 24.06  | 7.94 | 31.15  | 4.64 | -8.79      | 3.78 |
| 3            | 91.65  | 1.78 | 90.23  | 1.66 | 87.60  | 2.38 | 11.60  | 6.28 | 79.55  | 8.18 | 79.86  | 4.15 | 86.40  | 5.11 | 10.69      | 5.73 |
| 1            | 97.32  | 4.75 | 93.08  | 4.27 | 96.92  | 1.04 | 52.30  | 4.28 | 90.51  | 2.88 | 91.84  | 3.11 | 92.39  | 3.16 | 39.94      | 6.14 |
| 0.3          | 99.80  | 2.66 | 98.96  | 2.05 | 99.41  | 2.42 | 90.29  | 6.22 | 97.15  | 4.34 | 99.60  | 1.53 | 97.24  | 3.71 | 91.61      | 4.59 |
| GI50 (ug/ml) | >30    |      | 4.843  |      | 18.650 |      | 1.030  |      | 5.558  |      | 5.635  |      | 6.829  |      | 0.080      |      |
| GI50 (uM)    |        |      | 11.8   |      | 43.8   |      | 2.7    |      | 13.4   |      | 14.8   |      | 16.5   |      | 0.15       |      |
|              |        |      |        |      |        |      |        |      |        |      |        |      |        |      |            |      |
| NCI-H23      |        |      |        |      |        |      |        |      |        |      |        |      |        |      |            |      |
| Compound     | 1      |      | 2      |      | 3      |      | 4      |      | 5      |      | 6      |      | 7      |      | 8          |      |
| Conc.(ug/ml) | Mean   | SD   | Mean       | SD   |
| 30           | -24.27 | 0.95 | -19.16 | 7.41 | -25.34 | 0.75 | -21.94 | 3.89 | -24.38 | 7.35 | -17.49 | 0.10 | -2.46  | 6.34 | -17.73     | 4.08 |
| 10           | 35.36  | 4.86 | -13.07 | 5.52 | 11.81  | 3.34 | -7.53  | 5.33 | -17.82 | 4.32 | -7.75  | 3.34 | 61.62  | 2.07 | 13.47      | 3.68 |
| 3            | 84.65  | 5.05 | 21.91  | 6.19 | 86.27  | 7.48 | 16.92  | 2.57 | 31.12  | 6.27 | 25.90  | 4.10 | 68.23  | 8.21 | 70.43      | 6.35 |
| 1            | 89.23  | 6.55 | 44.60  | 2.44 | 91.62  | 5.48 | 69.95  | 4.99 | 62.17  | 2.90 | 80.09  | 7.75 | 75.87  | 7.74 | 86.95      | 4.62 |
| 0.3          | 96.50  | 6.23 | 90.64  | 8.22 | 97.92  | 2.68 | 91.35  | 1.12 | 91.28  | 5.40 | 95.97  | 5.85 | 98.18  | 4.26 | 97.24      | 2.50 |
| GI50 (ug/ml) | 7.090  |      | 0.966  |      | 5.239  |      | 1.433  |      | 1.429  |      | 1.842  |      | 7.122  |      | 4.218      |      |
| GI50 (uM)    | 19.6   |      | 2.9    |      | 14.0   |      | 4.0    |      | 4.4    |      | 4.7    |      | 16.1   |      | 9.8        |      |
|              |        |      |        |      |        |      |        |      |        |      |        |      |        |      |            |      |
| Compound     | 9      |      | 10     |      | 11     |      | 13     |      | 14     |      | 15     |      | 16     |      | Adriamycin |      |
| Conc.(ug/ml) | Mean   | SD   | Mean       | SD   |
| 30           | 78.92  | 7.91 | 22.07  | 4.69 | 25.00  | 6.08 | -24.33 | 3.45 | -6.39  | 1.97 | -6.37  | 6.63 | -4.54  | 7.51 | -14.67     | 1.91 |
| 10           | 88.06  | 6.93 | 75.18  | 3.85 | 78.50  | 8.62 | -15.73 | 7.46 | 31.54  | 7.20 | 23.31  | 6.46 | 31.79  | 3.19 | -5.25      | 3.96 |
| 3            | 90.02  | 5.29 | 81.71  | 2.82 | 89.06  | 8.73 | 28.18  | 9.17 | 69.68  | 1.95 | 76.85  | 8.77 | 72.69  | 6.36 | 18.10      | 4.43 |
| 1            | 93.39  | 4.10 | 86.18  | 3.80 | 92.17  | 4.91 | 62.13  | 5.72 | 78.28  | 5.99 | 88.73  | 4.83 | 80.95  | 4.49 | 20.39      | 1.00 |
| 0.3          | 100.52 | 1.95 | 94.57  | 8.61 | 97.42  | 6.41 | 94.49  | 7.40 | 93.00  | 6.73 | 93.97  | 5.31 | 93.59  | 5.66 | 93.40      | 6.96 |
| GI50 (ug/ml) | >30    |      | 4.867  |      | 17.790 |      | 1.412  |      | 4.657  |      | 5.249  |      | 5.125  |      | 0.066      |      |
| GI50 (uM)    |        |      | 11.9   |      | 41.8   |      | 3.7    |      | 11.2   |      | 13.8   |      | 12.4   |      | 0.12       |      |

|              |        |      |        |      |        |      |        |      |        |      |        |      |        |      |            |      |
|--------------|--------|------|--------|------|--------|------|--------|------|--------|------|--------|------|--------|------|------------|------|
| PC-3         |        |      |        |      |        |      |        |      |        |      |        |      |        |      |            |      |
| Compound     | 1      |      | 2      |      | 3      |      | 4      |      | 5      |      | 6      |      | 7      |      | 8          |      |
| Conc.(ug/ml) | Mean   | SD   | Mean       | SD   |
| 30           | -15.01 | 5.75 | -23.54 | 4.42 | -17.29 | 4.07 | -18.15 | 6.40 | -25.37 | 8.49 | -16.09 | 5.40 | -0.50  | 2.99 | -24.43     | 5.69 |
| 10           | 28.40  | 4.99 | -15.52 | 6.14 | 21.65  | 4.79 | -11.73 | 5.46 | -15.33 | 3.48 | -1.03  | 6.47 | 71.26  | 3.26 | 19.23      | 4.63 |
| 3            | 79.55  | 5.57 | 16.33  | 4.56 | 79.71  | 4.75 | 27.28  | 5.82 | 30.28  | 4.82 | 21.12  | 8.45 | 89.46  | 5.29 | 55.47      | 5.57 |
| 1            | 91.61  | 5.24 | 40.75  | 5.67 | 94.51  | 3.73 | 58.89  | 4.20 | 61.23  | 9.09 | 86.83  | 7.34 | 96.72  | 3.46 | 83.03      | 4.74 |
| 0.3          | 96.52  | 4.69 | 92.69  | 5.61 | 99.45  | 2.32 | 96.32  | 6.58 | 94.38  | 3.40 | 98.08  | 2.64 | 98.06  | 4.04 | 91.59      | 5.09 |
| GI50 (ug/ml) | 5.836  |      | 0.883  |      | 5.403  |      | 1.346  |      | 1.422  |      | 1.907  |      | 11.78  |      | 3.232      |      |
| GI50 (uM)    | 16.1   |      | 2.7    |      | 14.4   |      | 3.7    |      | 4.4    |      | 4.8    |      | 26.6   |      | 7.5        |      |
|              |        |      |        |      |        |      |        |      |        |      |        |      |        |      |            |      |
| Compound     | 9      |      | 10     |      | 11     |      | 13     |      | 14     |      | 15     |      | 16     |      | Adriamycin |      |
| Conc.(ug/ml) | Mean   | SD   | Mean       | SD   |
| 30           | 68.71  | 7.66 | 10.68  | 0.95 | 15.81  | 4.61 | -18.37 | 1.80 | -12.38 | 4.59 | -4.10  | 9.64 | -4.33  | 4.74 | -11.55     | 4.43 |
| 10           | 82.17  | 6.02 | 71.33  | 6.75 | 70.98  | 4.23 | -16.46 | 5.07 | 19.98  | 6.37 | 22.79  | 6.86 | 15.25  | 3.96 | -4.51      | 7.69 |
| 3            | 84.81  | 4.24 | 82.75  | 8.75 | 82.70  | 4.30 | 23.03  | 7.86 | 72.62  | 5.08 | 89.10  | 9.05 | 89.51  | 2.63 | 18.60      | 3.85 |
| 1            | 93.23  | 2.15 | 94.53  | 3.60 | 92.88  | 4.19 | 54.04  | 4.61 | 96.97  | 1.49 | 97.60  | 3.90 | 91.48  | 3.98 | 31.63      | 5.14 |
| 0.3          | 96.07  | 3.39 | 99.40  | 1.48 | 98.54  | 2.21 | 96.61  | 2.54 | 99.83  | 2.93 | 99.15  | 4.49 | 97.03  | 2.63 | 97.44      | 2.59 |
| GI50 (ug/ml) | >30    |      | 4.182  |      | 13.970 |      | 1.182  |      | 4.802  |      | 6.408  |      | 5.813  |      | 0.079      |      |
| GI50 (uM)    |        |      | 10.2   |      | 32.8   |      | 3.1    |      | 11.5   |      | 16.9   |      | 14.0   |      | 0.15       |      |
|              |        |      |        |      |        |      |        |      |        |      |        |      |        |      |            |      |
| NUGC-3       |        |      |        |      |        |      |        |      |        |      |        |      |        |      |            |      |
| Compound     | 1      |      | 2      |      | 3      |      | 4      |      | 5      |      | 6      |      | 7      |      | 8          |      |
| Conc.(ug/ml) | Mean   | SD   | Mean       | SD   |
| 30           | -26.66 | 3.44 | -26.53 | 3.48 | -30.32 | 9.02 | -21.59 | 5.96 | -26.17 | 4.67 | -22.84 | 5.91 | -11.29 | 4.96 | -25.05     | 2.22 |
| 10           | 21.72  | 4.20 | -19.99 | 3.94 | 8.93   | 7.03 | -18.51 | 4.96 | -22.93 | 5.77 | -10.86 | 3.65 | 65.84  | 4.98 | 10.12      | 6.13 |
| 3            | 44.27  | 3.84 | 15.26  | 4.44 | 52.41  | 4.60 | 21.51  | 3.46 | 21.37  | 4.04 | 18.83  | 4.04 | 70.56  | 5.65 | 45.25      | 4.43 |
| 1            | 86.95  | 9.33 | 42.38  | 4.17 | 92.58  | 3.73 | 61.29  | 3.30 | 51.10  | 7.87 | 72.34  | 5.77 | 82.39  | 9.12 | 62.87      | 6.80 |
| 0.3          | 97.62  | 3.90 | 85.49  | 2.31 | 99.54  | 1.96 | 82.78  | 7.28 | 96.23  | 6.52 | 94.06  | 4.82 | 93.76  | 1.90 | 88.45      | 4.85 |
| GI50 (ug/ml) | 2.816  |      | 0.849  |      | 3.115  |      | 1.218  |      | 1.098  |      | 1.515  |      | 8.387  |      | 1.860      |      |
| GI50 (uM)    | 7.8    |      | 2.6    |      | 8.3    |      | 3.4    |      | 3.4    |      | 3.8    |      | 18.9   |      | 4.3        |      |
|              |        |      |        |      |        |      |        |      |        |      |        |      |        |      |            |      |
| Compound     | 9      |      | 10     |      | 11     |      | 13     |      | 14     |      | 15     |      | 16     |      | Adriamycin |      |
| Conc.(ug/ml) | Mean   | SD   | Mean       | SD   |
| 30           | 70.92  | 3.98 | 4.91   | 6.68 | 25.36  | 6.62 | -24.75 | 1.78 | -18.41 | 5.93 | -5.68  | 4.83 | -9.34  | 5.62 | -14.47     | 4.70 |
| 10           | 78.70  | 4.44 | 62.75  | 7.65 | 60.17  | 1.77 | -15.65 | 5.61 | 23.37  | 9.73 | 18.80  | 8.81 | 20.76  | 7.41 | -1.84      | 2.43 |
| 3            | 91.00  | 8.43 | 76.02  | 9.03 | 71.90  | 5.95 | 8.75   | 3.96 | 67.41  | 6.49 | 80.45  | 6.05 | 81.55  | 6.07 | 19.25      | 8.08 |
| 1            | 97.88  | 7.24 | 88.82  | 2.34 | 86.34  | 7.53 | 35.44  | 3.07 | 85.51  | 9.80 | 87.29  | 4.59 | 89.09  | 4.08 | 32.69      | 7.46 |
| 0.3          | 98.59  | 7.06 | 100.94 | 6.00 | 93.37  | 2.74 | 83.08  | 5.55 | 96.54  | 4.53 | 95.74  | 3.21 | 91.50  | 7.66 | 92.28      | 3.69 |
| GI50 (ug/ml) | >30    |      | 3.147  |      | 11.220 |      | 0.721  |      | 4.314  |      | 5.267  |      | 5.477  |      | 0.079      |      |
| GI50 (uM)    |        |      | 7.7    |      | 26.3   |      | 1.9    |      | 10.4   |      | 13.9   |      | 13.2   |      | 0.15       |      |

|              |  |        |      |        |       |        |      |        |      |        |      |        |      |        |      |            |      |
|--------------|--|--------|------|--------|-------|--------|------|--------|------|--------|------|--------|------|--------|------|------------|------|
| MDA-MB-231   |  |        |      |        |       |        |      |        |      |        |      |        |      |        |      |            |      |
| Compound     |  | 1      |      | 2      |       | 3      |      | 4      |      | 5      |      | 6      |      | 7      |      | 8          |      |
| Conc.(ug/ml) |  | Mean   | SD   | Mean   | SD    | Mean   | SD   | Mean   | SD   | Mean   | SD   | Mean   | SD   | Mean   | SD   | Mean       | SD   |
| 30           |  | -15.61 | 5.11 | -20.08 | 3.30  | -18.47 | 1.48 | -12.47 | 8.29 | -19.15 | 3.73 | -14.46 | 4.48 | -7.18  | 4.85 | -12.12     | 2.20 |
| 10           |  | 32.96  | 3.80 | -7.84  | 2.16  | 22.50  | 2.83 | -2.98  | 3.91 | -11.98 | 2.02 | 2.34   | 4.67 | 65.49  | 6.61 | 30.13      | 5.23 |
| 3            |  | 79.43  | 6.79 | 24.33  | 5.43  | 83.13  | 3.67 | 23.29  | 8.61 | 28.32  | 5.71 | 30.19  | 2.71 | 78.42  | 7.82 | 77.56      | 8.42 |
| 1            |  | 87.89  | 3.22 | 46.31  | 3.13  | 96.93  | 5.47 | 75.66  | 2.86 | 82.84  | 4.29 | 89.23  | 3.60 | 87.90  | 5.35 | 89.16      | 5.19 |
| 0.3          |  | 99.67  | 3.55 | 91.44  | 5.84  | 98.81  | 4.32 | 84.88  | 5.40 | 93.63  | 3.44 | 94.54  | 2.41 | 99.02  | 2.26 | 91.92      | 7.52 |
| GI50         |  | 6.113  |      | 1.029  |       | 5.783  |      | 1.644  |      | 1.962  |      | 2.189  |      | 10.78  |      | 5.723      |      |
| GI50 (uM)    |  | 16.9   |      | 3.1    |       | 15.5   |      | 4.6    |      | 6.0    |      | 5.5    |      | 24.3   |      | 13.3       |      |
|              |  |        |      |        |       |        |      |        |      |        |      |        |      |        |      |            |      |
| Compound     |  | 9      |      | 10     |       | 11     |      | 13     |      | 14     |      | 15     |      | 16     |      | Adriamycin |      |
| Conc.(ug/ml) |  | Mean   | SD   | Mean   | SD    | Mean   | SD   | Mean   | SD   | Mean   | SD   | Mean   | SD   | Mean   | SD   | Mean       | SD   |
| 30           |  | 75.31  | 9.25 | 12.02  | 8.82  | 25.96  | 2.88 | -16.03 | 4.00 | -3.44  | 6.51 | -3.99  | 5.65 | -4.34  | 2.32 | -17.81     | 4.45 |
| 10           |  | 81.10  | 4.02 | 65.60  | 3.69  | 58.00  | 2.41 | -12.43 | 5.90 | 17.60  | 8.99 | 25.88  | 9.19 | 27.15  | 5.72 | -6.17      | 5.64 |
| 3            |  | 90.00  | 7.38 | 72.70  | 6.56  | 76.80  | 5.98 | 22.16  | 4.67 | 82.75  | 6.56 | 74.52  | 1.27 | 82.93  | 2.70 | 23.80      | 4.79 |
| 1            |  | 93.10  | 3.89 | 83.53  | 4.33  | 84.11  | 4.92 | 65.75  | 7.00 | 91.73  | 4.72 | 80.37  | 8.59 | 85.44  | 3.52 | 36.38      | 6.20 |
| 0.3          |  | 93.48  | 2.24 | 94.23  | 5.06  | 97.11  | 5.45 | 98.08  | 4.94 | 98.19  | 4.04 | 91.42  | 9.57 | 99.48  | 5.08 | 91.69      | 3.97 |
| GI50 (ug/ml) |  | >30    |      | 3.188  |       | 11.450 |      | 1.431  |      | 5.428  |      | 4.920  |      | 6.027  |      | 0.086      |      |
| GI50 (uM)    |  |        |      | 7.8    |       | 26.9   |      | 3.7    |      | 13.0   |      | 12.9   |      | 14.6   |      | 0.16       |      |
|              |  |        |      |        |       |        |      |        |      |        |      |        |      |        |      |            |      |
| HCT-15       |  |        |      |        |       |        |      |        |      |        |      |        |      |        |      |            |      |
| Compound     |  | 1      |      | 2      |       | 3      |      | 4      |      | 5      |      | 6      |      | 7      |      | 8          |      |
| Conc.(ug/ml) |  | Mean   | SD   | Mean   | SD    | Mean   | SD   | Mean   | SD   | Mean   | SD   | Mean   | SD   | Mean   | SD   | Mean       | SD   |
| 30           |  | -20.73 | 4.91 | -12.67 | 4.74  | -16.10 | 3.40 | -12.69 | 3.58 | -20.52 | 2.57 | -15.53 | 4.54 | -7.22  | 7.54 | -7.06      | 5.05 |
| 10           |  | 23.40  | 7.88 | -6.13  | 2.71  | 9.59   | 6.30 | -4.30  | 3.87 | -12.43 | 3.05 | -4.11  | 2.02 | 67.10  | 2.47 | 31.13      | 5.94 |
| 3            |  | 72.69  | 8.67 | 25.47  | 10.34 | 80.13  | 6.27 | 20.70  | 4.51 | 32.20  | 3.89 | 22.41  | 6.69 | 78.00  | 5.55 | 67.12      | 5.51 |
| 1            |  | 86.66  | 4.07 | 43.17  | 7.44  | 91.28  | 8.18 | 66.67  | 6.39 | 81.75  | 6.86 | 90.76  | 5.07 | 88.47  | 5.70 | 80.65      | 4.50 |
| 0.3          |  | 99.75  | 4.12 | 91.78  | 4.10  | 97.14  | 5.01 | 90.73  | 3.58 | 95.03  | 2.66 | 95.32  | 4.94 | 92.83  | 3.21 | 92.15      | 4.91 |
| GI50 (ug/ml) |  | 4.779  |      | 0.993  |       | 4.691  |      | 1.414  |      | 2.037  |      | 2.035  |      | 10.900 |      | 4.508      |      |
| GI50 (uM)    |  | 13.2   |      | 3.0    |       | 12.5   |      | 3.9    |      | 6.2    |      | 5.2    |      | 24.6   |      | 10.5       |      |
|              |  |        |      |        |       |        |      |        |      |        |      |        |      |        |      |            |      |
| Compound     |  | 9      |      | 10     |       | 11     |      | 13     |      | 14     |      | 15     |      | 16     |      | Adriamycin |      |
| Conc.(ug/ml) |  | Mean   | SD   | Mean   | SD    | Mean   | SD   | Mean   | SD   | Mean   | SD   | Mean   | SD   | Mean   | SD   | Mean       | SD   |
| 30           |  | 65.62  | 7.58 | 7.25   | 7.55  | 28.84  | 5.33 | -10.59 | 1.32 | -4.27  | 4.23 | -1.17  | 4.63 | 1.45   | 3.58 | -13.54     | 2.53 |
| 10           |  | 78.29  | 8.68 | 64.56  | 5.58  | 83.31  | 2.86 | -4.38  | 1.82 | 19.16  | 6.99 | 25.74  | 7.38 | 31.03  | 4.07 | -9.76      | 6.71 |
| 3            |  | 81.38  | 9.03 | 87.21  | 2.35  | 90.77  | 3.17 | 27.63  | 6.64 | 81.69  | 3.88 | 78.10  | 2.50 | 64.00  | 5.83 | 12.95      | 8.63 |
| 1            |  | 90.04  | 6.95 | 89.85  | 3.47  | 94.41  | 5.23 | 79.33  | 4.22 | 89.27  | 0.81 | 84.40  | 4.59 | 79.24  | 7.16 | 31.53      | 4.09 |
| 0.3          |  | 96.81  | 1.77 | 100.41 | 2.67  | 96.14  | 2.18 | 95.91  | 4.16 | 92.81  | 4.06 | 92.03  | 4.36 | 94.16  | 5.63 | 97.28      | 3.80 |
| GI50 (ug/ml) |  | >30    |      | 3.718  |       | 19.970 |      | 1.869  |      | 5.417  |      | 5.438  |      | 4.354  |      | 0.078      |      |
| GI50 (uM)    |  |        |      | 9.1    |       | 46.9   |      | 4.9    |      | 13.0   |      | 14.3   |      | 10.5   |      | 0.15       |      |

**Figure S31.** Results of the cytotoxicity test of compounds 1-11 and 13-16.
